# Supplementary material
Source: MDPI journal article supplement (https://www.mdpi.com/2079-8954/11/6/275)
Supplement: s1 [file s1]

## SUPPLEMENTARY MATERIALS

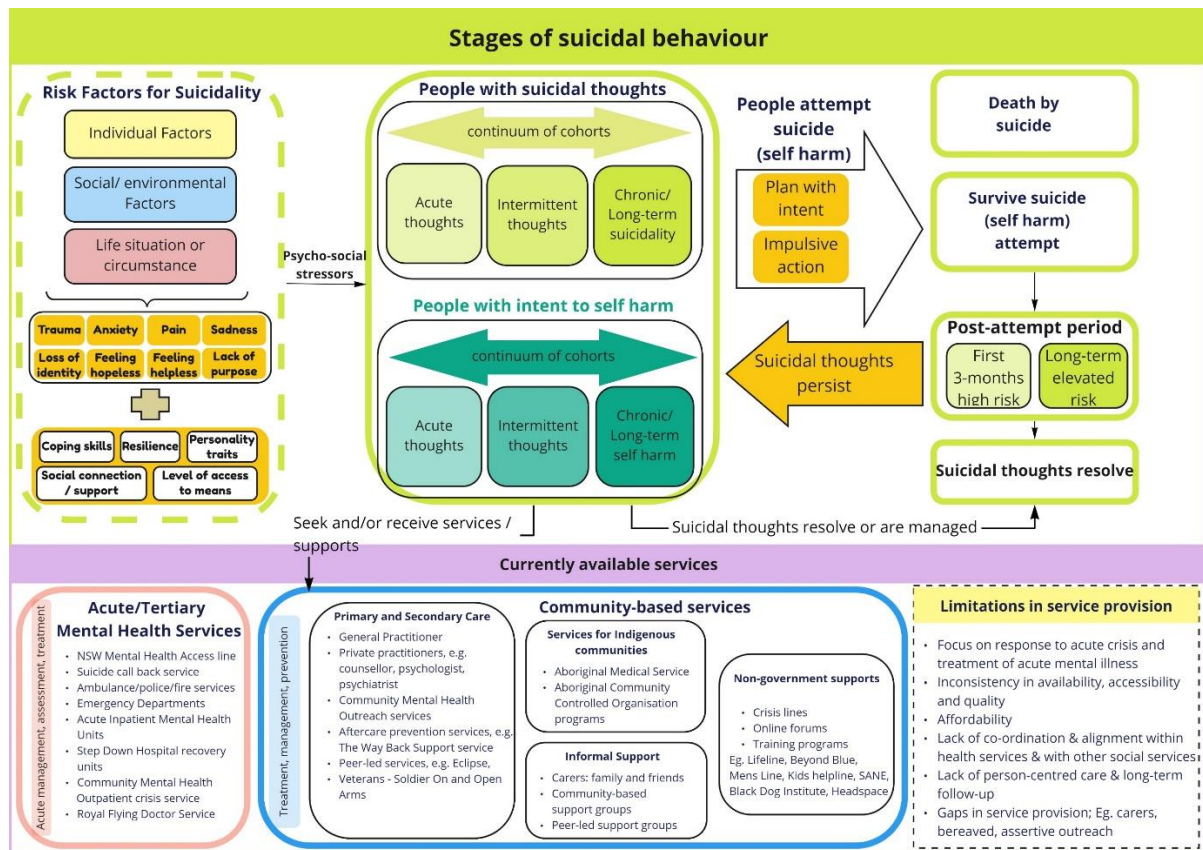

Figure S1. Conceptual model of the stages of suicidal behaviour.

### (A) "Stages of Suicidal Behaviour" sector

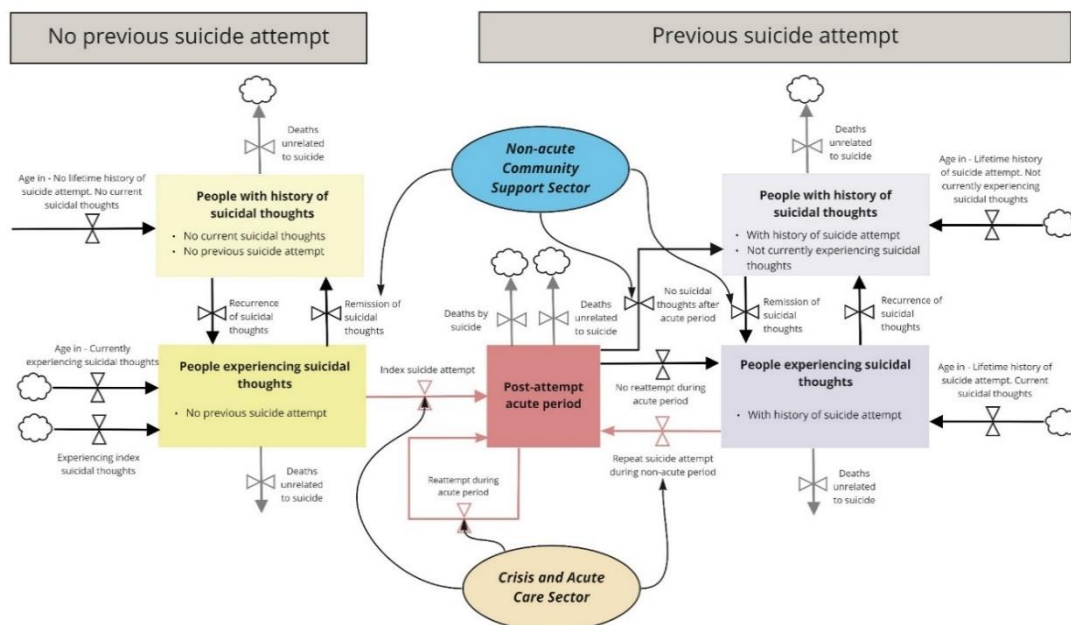

(B) “Non-acute Community Support” sector

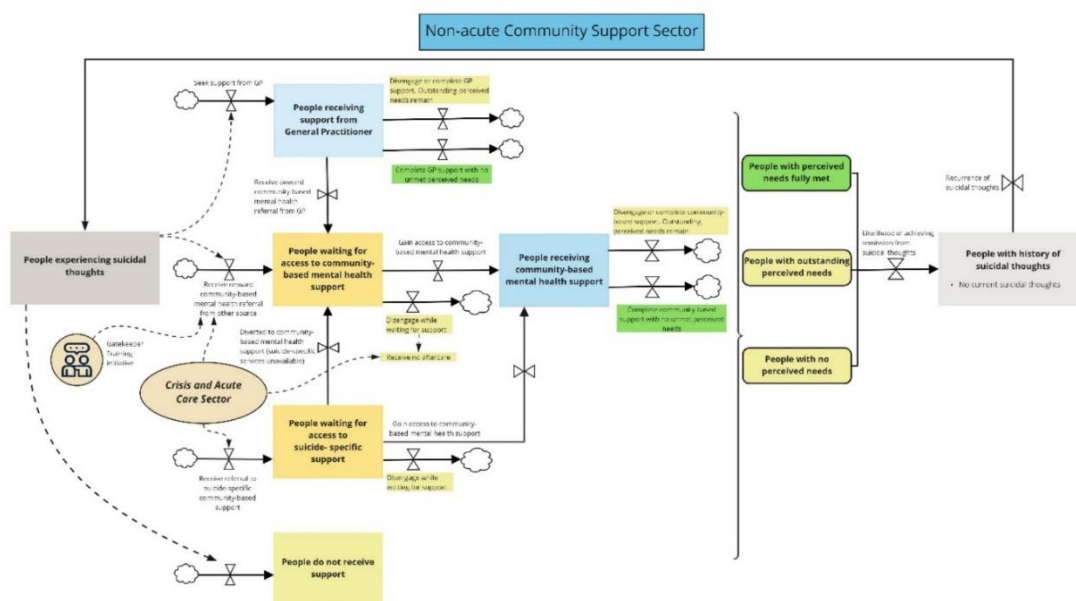

(C) “Crisis and Acute Care” sector

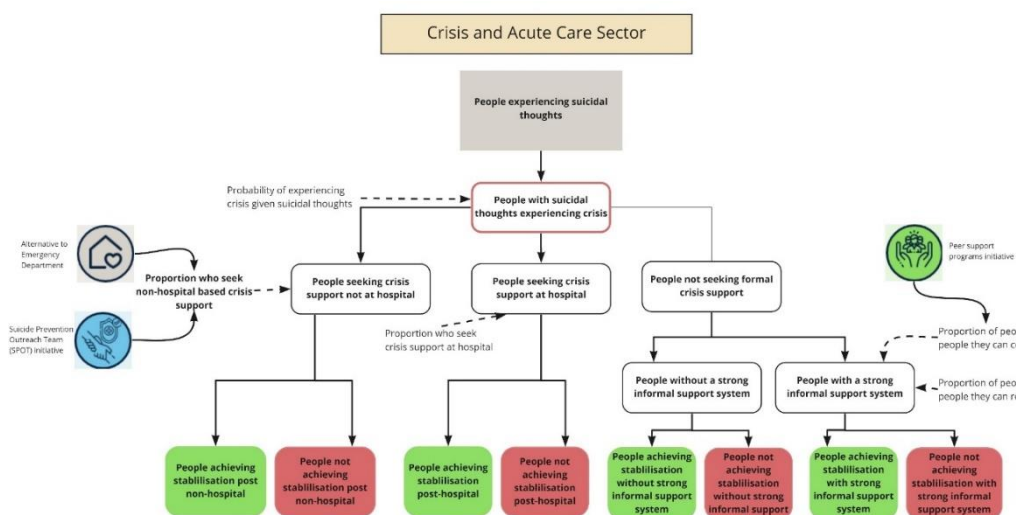

Figure S2. Refined conceptual diagram of proposed model sectors.

### Description of system dynamics model components

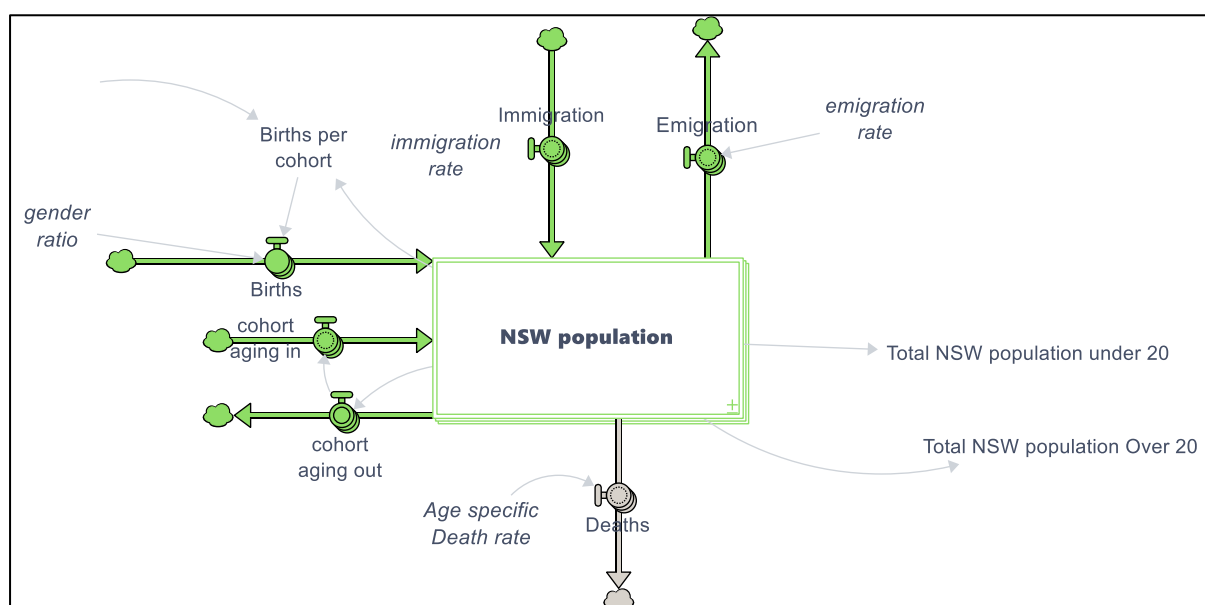

**Figure S3.** Population Dynamics sector.

Population dynamics: The effect of change in population dynamics in NSW are accounted for within the timeframe of the model. The population sector uses an open population changing over time and represents the NSW population catchment via the birth rate, migration rate and death rate. The model includes the population of NSW stratified by gender and five-year age groups. The population projection has been produced in line with Australian Bureau of Statistics Series B projections, which largely continues currently observed demographic trends

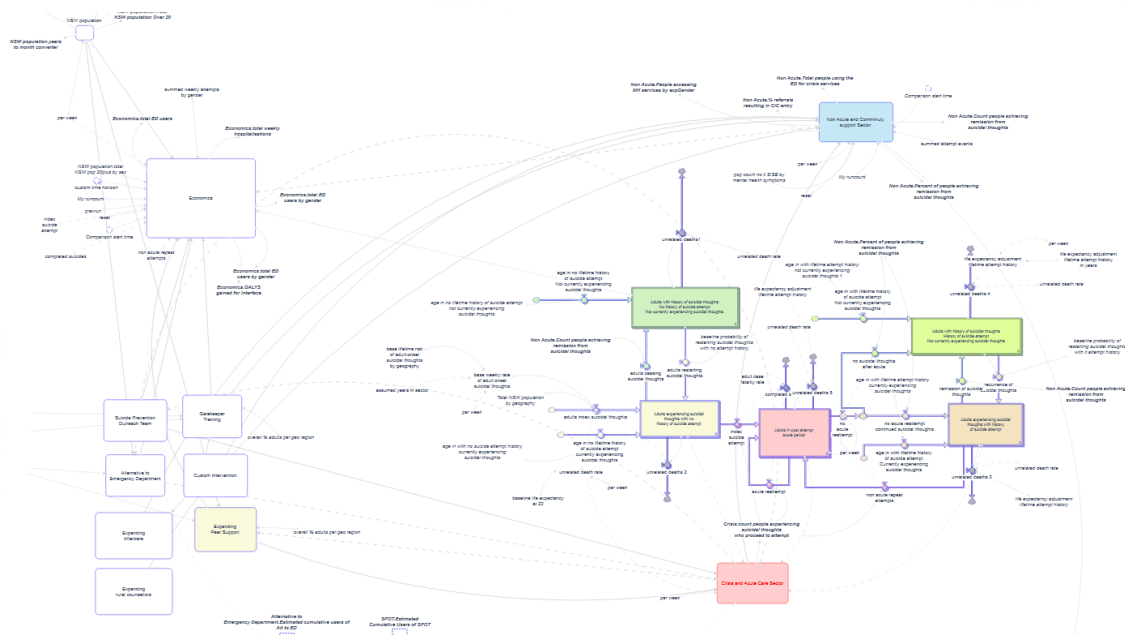

**Figure S4.** Stages of suicide behaviour sector.

**Stages of suicidal behaviour sector:** This is the core structure of the model, capturing the stages of suicide-related thoughts and behaviour adults (20-years old and over) with a lifetime history of suicidal thoughts and/or behaviour may move through. The model simulates a proportion of the general adult population flowing into this sector for the first time each time-step (week) by experiencing suicidal thoughts for the first time (onset of index suicidal thoughts). In addition, at each time-step the proportion of youth turning 20-years old at that time who have a history of suicidal thoughts and/or behaviours flow into the model into the stage that corresponds with their 12-month and lifetime history of suicidal thoughts and behaviours. During the model's simulation period the populations within the model transition between experiencing and not experiencing suicidal thoughts (as controlled by the **Non-Acute Community Support Sector** described below) and experiencing crisis events which may or may not result in a suicide attempt (as controlled by the **Crisis and Acute Care** sector described below). The model differentiates the populations who have a lifetime history of one or more suicide attempts from those who do not. This is because the rates of experiencing a suicidal crisis, accessing services, experiencing subsequent suicide attempts, and the likelihood of achieving remission from suicidal thoughts differs significantly between these two groups. The same logic has been used when differentiating individuals who have experienced one or more suicide attempts from those who have not experienced a suicide attempt within the last 12 months.

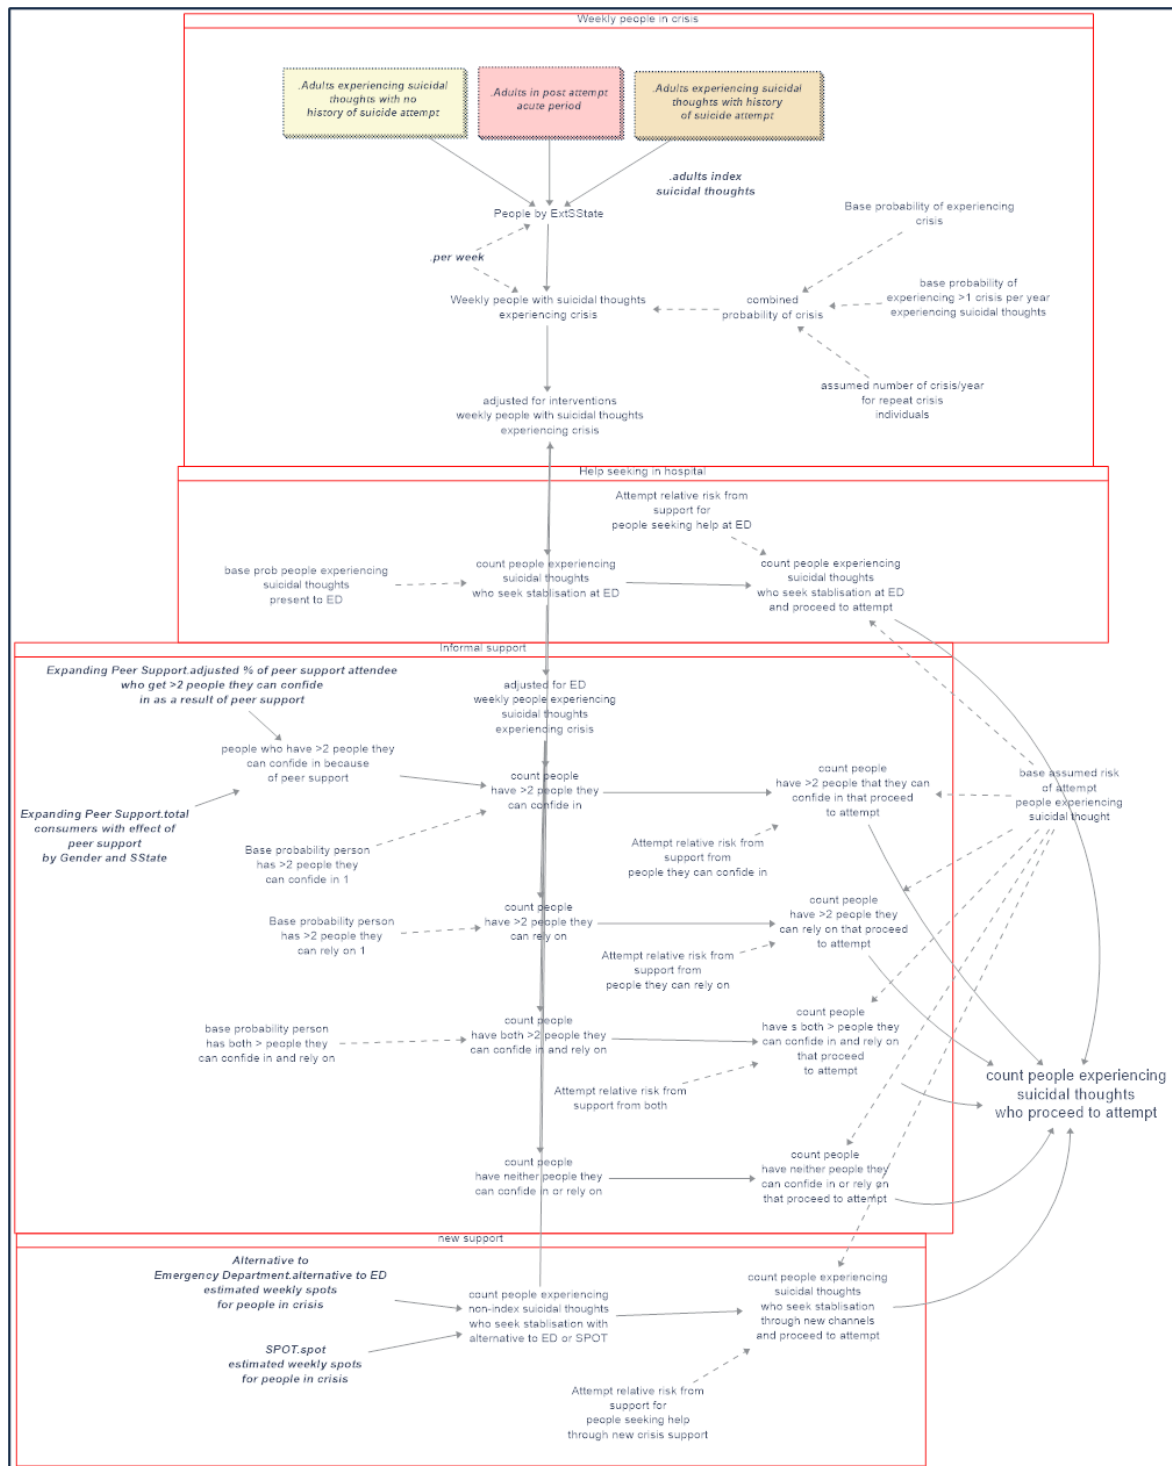

Figure S5. Crisis and acute care sector.

**Crisis and acute care sector:** The rate at which individuals who are experiencing suicidal thoughts proceed to a suicide attempt or re-attempt is controlled by the structure within the **Crisis and Acute Care** sector of the model. In the model, a portion of those who are experiencing suicidal thoughts will go on to experience one or more crisis events. Individuals with a previous history of suicide attempt are at higher risk of experiencing one or more crisis events during their period of suicidal thoughts, as are individuals who are in their first year of ever experiencing suicidal thoughts. Individuals who are experiencing crisis

are at risk of proceeding to a suicide attempt. The stage in the suicidal behaviour sector in which those in crisis accumulate determines their modelled base risk of proceeding to a suicide attempt. The risk of suicide attempt is then 'buffered' by seeking formal stabilisation support and by informal social support. In the model a portion of those in crisis seek formal stabilisation support at hospital or through community-based suicide prevention outreach teams or alternatives to emergency department presentation (See Table 1 in main text for a description of initiatives). The assumption in the model is that formal stabilisation support has a strong 'buffering effect' on the likelihood that a person in crisis will proceed to a suicide attempt. Those who do not seek formal stabilisation support are classified by the model according to the strength of their social support networks. Having a strong social support network has been shown to, in some cases, moderate the relationship between suicidal thoughts and suicide attempt [36-38]. The model accounts for varying levels of social support via four groupings: individuals that have more than two people they can confide in; individuals that have more than two people they can rely on; individuals that have both more than two people they can confide in and more than two people they can rely on; and individuals that have neither. Acknowledging that some individuals do proceed to a suicide attempt despite having a strong social support network and/or seeking formal support, the model then uses the adjusted risk of proceeding to a suicide attempt to calculate the weekly incidence of suicide attempts.

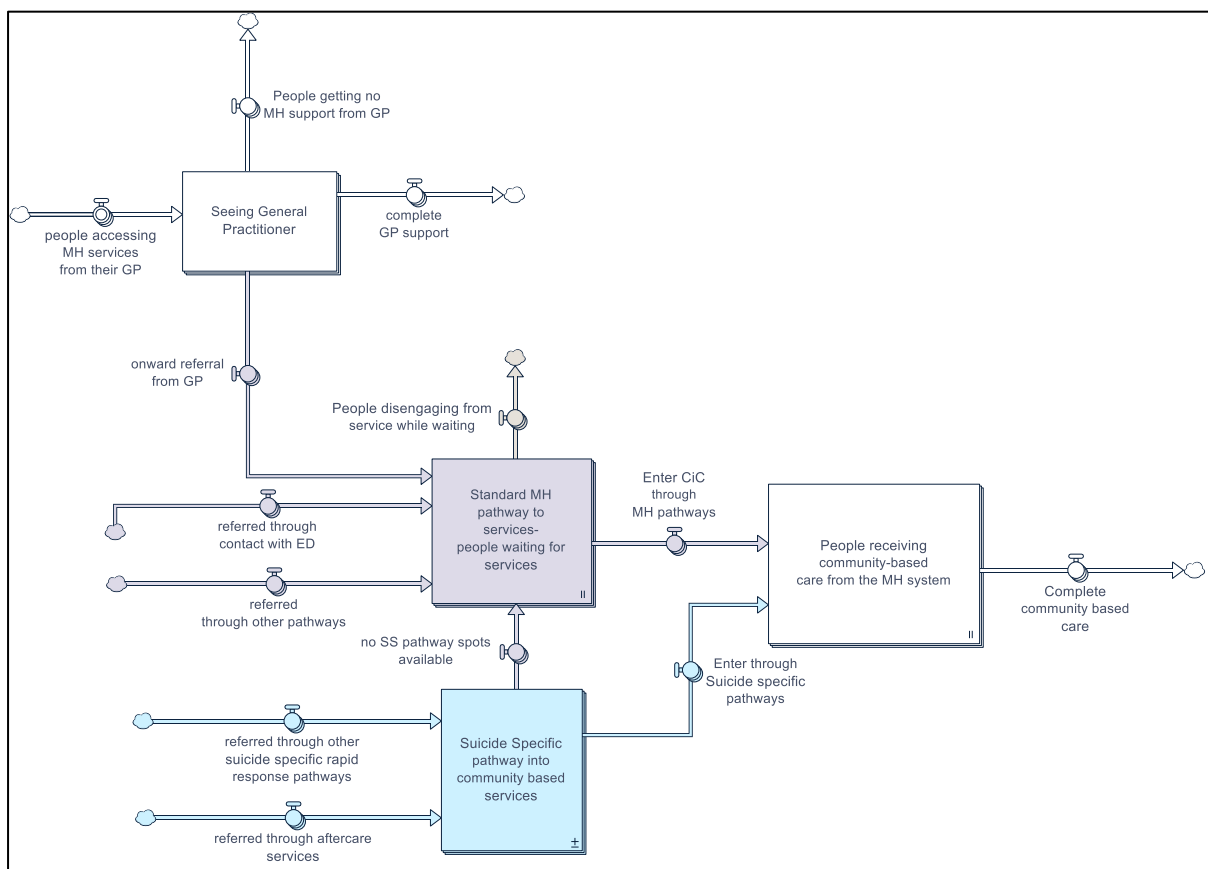

**Figure S6.** Non-acute community support sector.

**Non-acute Community Support and Service Access Sector:** The rate at which individuals flow between experiencing and not experiencing suicidal thoughts is controlled by the structure within the Non-acute Community Support sector. In the model, a portion of those experiencing suicidal thoughts will access formal (non-acute) community-based support via three main channels, while others will not. These three channels shown in Figure 8 are via:

- General Practitioner pathway and services.
- Suicide-specific pathways and services (shown in blue).
- Standard mental health related pathways (shown in purple).

The suicide-specific and standard mental health related pathways are the main non-acute community-based support pathways in the model. The primary difference between them is that individuals referred via suicide-specific pathways (where they exist) do not face extended wait times to receive support, whereas those entering via the standard mental health related pathways will wait for care when service demand exceeds service capacity.

The first pathway into support in the model is via General Practitioners (GP). Of those who visit their GP, some will receive ongoing support, some will only receive an onward referral to community-based support, some will receive both, and others will receive neither. Of those who do receive onward referrals from their GP, the assumption in the model is that those referrals will occur via the standard mental health pathway.

The second pathway allowing individuals access into community-based support in the model is via acute care and crisis services. Individuals who seek formal acute crisis stabilisation support (as described above), as well as a portion of individuals who proceeded to a suicide attempt, receive onward referrals to community-based support following their interactions with the acute care sector. Where available, a portion of those receiving onward referrals receive them through suicide-specific aftercare services, while the remainder receive referrals through more generalised mental health follow-up services. A portion of individuals flowing through both pathways may choose not to engage with the service or may engage but not initiate an onward connection to community-based services, though the model assumes that these rates are lower for the suicide-specific service. Additionally, a portion of individuals flowing through these aftercare or follow-up services will not establish a new connection with community-based services as they will already be connected.

The third pathway allows a small proportion of individuals to gain access to a referral to community-based support via either suicide-specific pathways or general mental health pathways that are not via the acute care sector or via GPs.



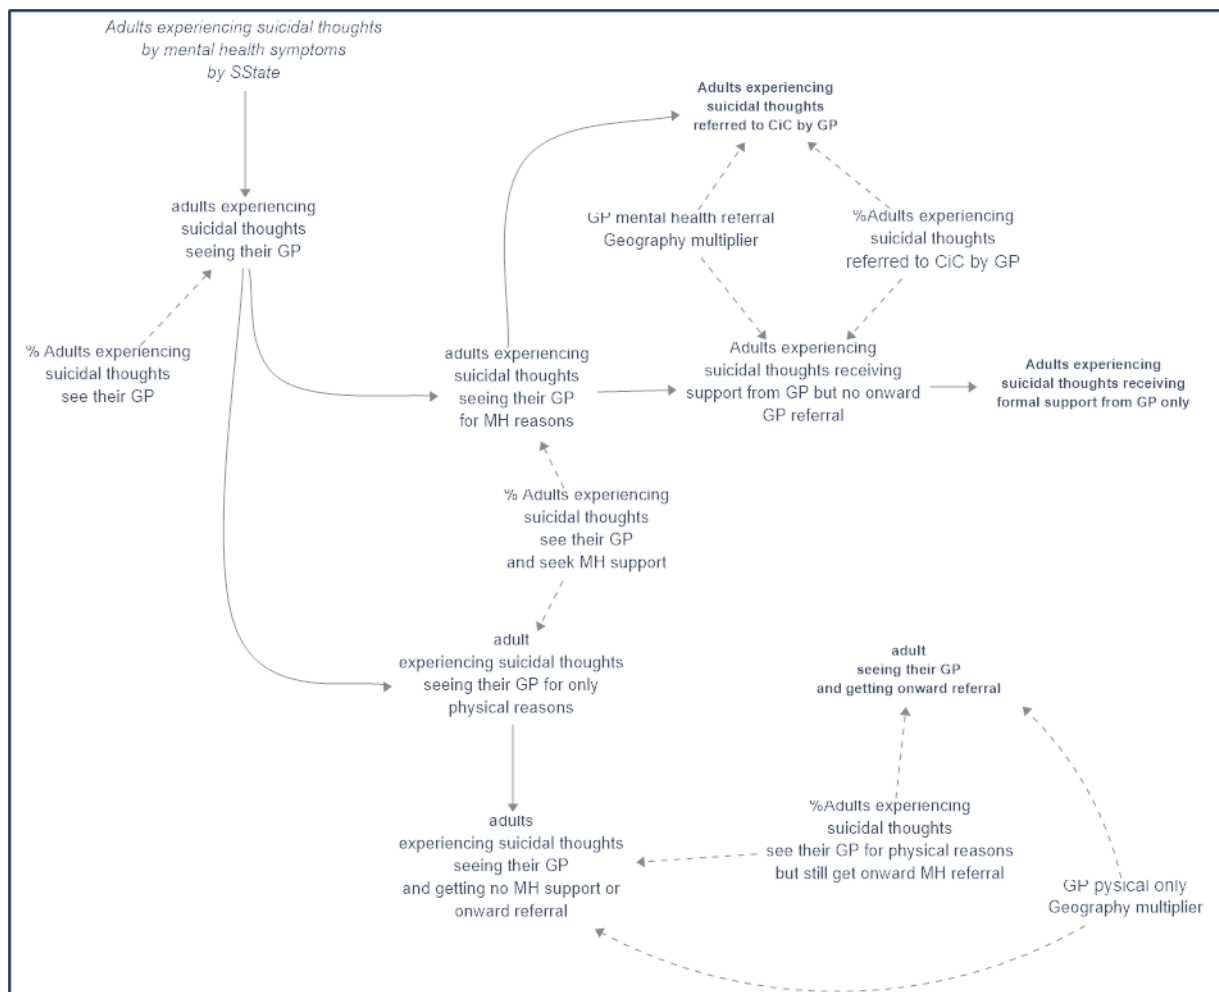

**Figure S7.** Non-acute community support and service effect sector.

**Non-acute community support and service effect sector:** The interface between service access and the effect this has on supporting individuals to transition to remission from suicidal thoughts is captured in the model in the Service Effect sector. The effect of service access is conceptualised in the model as the ability of services to meet the perceived needs of consumers. The needs of consumers that the mental health system can broadly meet are broken down in the model into five categories: information, medication, therapy, practical support and social support. Based on findings from the National Survey of Mental Health and Wellbeing 2007, the model has established an assumption that each consumer at high risk of suicide is likely to have a different combination and level of perceived need for support that could be provided by the mental health and primary care system across five broad domains of care, and that having these needs met increases an individual's likelihood of achieving remission from suicidal thoughts.

The model separates individuals into whether or not they have a perceived need for one or more of the five types of needs the mental health system can support. For those who are accessing services (as described above) the model estimates whether or not their need(s) are being met by:



1. determining the proportion of users of the mental health system who are able to access services that specifically address their outstanding perceived need(s);
2. for those who are able to access services for their needs, whether or not they perceive their needs as being fully met by the service.

Individuals who have a perceived need for support but do not access formal support within the mental health system are assumed to have outstanding needs.

Once the effect of mental health services to meet individual needs has been calculated, the adjusted proportion of outstanding needs is combined to determine the likelihood that an individual has one or more outstanding needs after receiving support from the mental health system (if they accessed formal support through the system). Once the overall effect of the system has been accounted for, the proportions of the population (divided by gender and stages of suicidal behaviour) who have no perceived needs, no unmet perceived needs and outstanding perceived needs are combined with the absolute risk of suicidal thoughts given each state of suicidal thoughts/behaviour to determine the proportion of the population who are able to achieve remission from their suicidal thoughts.

The assumptions in using this approach are that for some consumers:

- achieving remission with outstanding perceived needs is possible.
- may not achieve remission even if they have no perceived needs for formal support.

This is in recognition that the drivers of suicidal thinking are broad and may cross outside of the boundaries of the types of services and support currently provided by the mental health service system.

**Table S1.** - Numerical Input and Data Sources.

| Main Model Structure                                                  |                    |                                                                                                                                                        |                                                                                                                                                                                                                                         |
|-----------------------------------------------------------------------|--------------------|--------------------------------------------------------------------------------------------------------------------------------------------------------|-----------------------------------------------------------------------------------------------------------------------------------------------------------------------------------------------------------------------------------------|
| Model Parameter                                                       | Arrayed by         | Parameter Value                                                                                                                                        | Notes                                                                                                                                                                                                                                   |
| Adult case fatality rate                                              | Gender             | [M] 5%<br>[F] 1.5%                                                                                                                                     | Estimated via model optimisation                                                                                                                                                                                                        |
| Base lifetime risk of adult-onset suicidal thoughts by geography      | Gender, Remoteness | [M, Major Cities] 8%<br>[M, Inner Regional] 7.36%<br>[M, Other] 7.5%<br>[F, Major Cities] 6.87%<br>[F, Inner Regional] 8.79%<br>[F, Other] 12%         | Derived from the National Survey of Mental Health and Wellbeing, 2007                                                                                                                                                                   |
| Baseline life expectancy at 20                                        | Gender             | [M] 60.6 years<br>[F] 64.8 years                                                                                                                       | Based on data from the Australian Bureau of Statistics (ABS) Life Tables, States, Territories and Australia 2016-2018                                                                                                                   |
| Baseline percent attempt by geography                                 | Gender, Remoteness | [M, Major Cities] 0.25%<br>[M, Inner Regional] 0.38%<br>[M, Other] 0.21%<br>[F, Major Cities] 0.40%<br>[F, Inner Regional] 0.36%<br>[F, Other] 0.40%   | Derived from the National Survey of Mental Health and Wellbeing, 2007 and ABS Population Estimates by Remoteness Area (ASGS 2016), 2008 to 2018. The 'Other' array includes all geographic areas more remote than 'inner regional'.     |
| Baseline percent former suicidal thoughts former attempt by geography | Gender, Remoteness | [M, Major Cities] 1.28%<br>[M, Inner Regional] 1.45%<br>[M, Other] 1.73%<br>[F, Major Cities] 3.16%<br>[F, Inner Regional] 3.38%<br>[F, Other] 3.79%   | Derived from the National Survey of Mental Health and Wellbeing, 2007 and ABS Population Estimates by Remoteness Area (ASGS 2016), 2008 to 2018. The 'Other' array includes all geographic areas more remote than 'inner regional'.     |
| Baseline percent former suicidal thoughts no attempt by geography     | Gender, Remoteness | [M, Major Cities] 7.86%<br>[M, Inner Regional] 9.15%<br>[M, Other] 8.55%<br>[F, Major Cities] 7.93%<br>[F, Inner Regional] 10.29%<br>[F, Other] 11.28% | Derived from the National Survey of Mental Health and Wellbeing, 2007 and ABS Population Estimates by Remoteness Area (ASGS 2016), 2008 to 2018. The 'Other' array includes all geographic areas more remote than 'inner regional'.     |
| Baseline percent suicidal thoughts with former attempt by geography   | Gender, Remoteness | [M, Major Cities] 0.55%<br>[M, Inner Regional] 0.35%<br>[M, Other] 0.18%<br>[F, Major Cities] 0.50%<br>[F, Inner Regional] 1.02%<br>[F, Other] 0.54%   | Derived from the National Survey of Mental Health and Wellbeing, 2007 and ABS Population Estimates by Remoteness Area (ASGS 2016), 2008 to 2018. The 'Other' array includes all geographic areas more remote than 'inner regional'.     |
| Baseline prevalence current suicidal thoughts no attempt history      | Gender, Remoteness | [M, Major Cities] 1.05%<br>[M, Inner Regional] 1.44%<br>[M, Other] 1.37%<br>[F, Major Cities] 1.98%<br>[F, Inner Regional] 1.45%<br>[F, Other] 1.14%   | Derived from the National Survey of Mental Health and Wellbeing, 2007 and ABS Population Estimates by Remoteness Area (ASGS 2016), 2008 to 2018. The 'Other' array includes all geographic areas more remote than 'inner regional'.     |
| Life expectancy adjustment lifetime attempt history in years          | Gender             | [M] -14.4 years<br>[F] -8.8 years                                                                                                                      | Derived from Jokinen, J., Talbäck, M., Feychting, M., Ahlbom, A., & Ljung, R. (2018). Life expectancy after the first suicide attempt. Acta Psychiatrica Scandinavica, 137(4), 287-295. Accounting only for non-suicide related deaths. |

|                                                                                             |                    |                                                   |                                                                        |
|---------------------------------------------------------------------------------------------|--------------------|---------------------------------------------------|------------------------------------------------------------------------|
| Percent 20 year olds with lifetime attempt history                                          | Gender             | [M] 1.26%<br>[F] 5.7%                             | Derived from the National Survey of Mental Health and Wellbeing, 2007  |
| Percent 20 year olds with lifetime attempt history currently experiencing suicidal thoughts | Gender             | [M] 25%<br>[F] 14%                                | Derived from the National Survey of Mental Health and Wellbeing, 2007  |
| Percent 20 year olds with lifetime history of suicidal thoughts but no attempt              | Gender             | [M] 6.9%<br>[F] 8.3%                              | Derived from the National Survey of Mental Health and Wellbeing, 2007  |
| Percent 20 year olds with no attempt history currently experiencing suicidal thoughts       | Gender             | [M] 17.7%<br>[F] 28.7%                            | Derived from the National Survey of Mental Health and Wellbeing, 2007  |
| Percent by geography adult                                                                  | Gender, Remoteness | Graphical                                         | ABS Population Estimates by Remoteness Area (ASGS 2016), 2008 to 2018  |
| Percent youth by geography                                                                  | Gender, Remoteness | Graphical                                         | ABS Population Estimates by Remoteness Area (ASGS 2016), 2008 to 2018  |
| <b>Crisis and Acute Care sector</b>                                                         |                    |                                                   |                                                                        |
| <b>Model Parameter</b>                                                                      | <b>Arrayed by</b>  | <b>Parameter Value</b>                            | <b>Notes</b>                                                           |
| Assumed number of crisis/year for repeat crisis individuals                                 |                    | 4                                                 | Estimated via model optimisation                                       |
| Attempt relative risk with support from people they can rely on and confide in              | extSSState, Gender | [M, Index year suicidal thoughts] 0.17            | Derived from the National Survey of Mental Health and Wellbeing, 2007. |
|                                                                                             |                    | [M, Non index year suicidal thoughts] 0.17        |                                                                        |
|                                                                                             |                    | [M, Acute post attempt period] 0.38               |                                                                        |
|                                                                                             |                    | [M, Suicidal thoughts with previous attempt] 0.17 |                                                                        |
|                                                                                             |                    | [F, Index year suicidal thoughts] 0.23            |                                                                        |
|                                                                                             |                    | [F, Non index year suicidal thoughts] 0.23        |                                                                        |
|                                                                                             |                    | [F, Acute post attempt period] 0.75               |                                                                        |
|                                                                                             |                    | [F, Suicidal thoughts with previous attempt] 0.38 |                                                                        |
| Attempt relative risk from support from people they can confide in                          | extSSState, Gender | [M, Index year suicidal thoughts] 0.41            | Derived from the National Survey of Mental Health and Wellbeing, 2007. |
|                                                                                             |                    | [M, Non index year suicidal thoughts] 0.41        |                                                                        |
|                                                                                             |                    | [M, Acute post attempt period] 0.64               |                                                                        |
|                                                                                             |                    | [M, Suicidal thoughts with previous attempt] 0.51 |                                                                        |
|                                                                                             |                    | [F, Index year suicidal thoughts] 0.47            |                                                                        |
|                                                                                             |                    | [F, Non index year suicidal thoughts] 0.47        |                                                                        |
|                                                                                             |                    | [F, Acute post attempt period]                    |                                                                        |

|                                                                                                 |                       |                                                                                                                                                                                                                                                                                                                                                                                                   |                                                                                                                                                                   |
|-------------------------------------------------------------------------------------------------|-----------------------|---------------------------------------------------------------------------------------------------------------------------------------------------------------------------------------------------------------------------------------------------------------------------------------------------------------------------------------------------------------------------------------------------|-------------------------------------------------------------------------------------------------------------------------------------------------------------------|
|                                                                                                 |                       | 0.85<br>[F, Suicidal thoughts with<br>previous attempt] 0.63                                                                                                                                                                                                                                                                                                                                      |                                                                                                                                                                   |
|                                                                                                 |                       | [M, Index year suicidal<br>thoughts] 0.42<br>[M, Non index year suicidal<br>thoughts] 0.42<br>[M, Acute post attempt period]<br>0.60<br>[M, Suicidal thoughts with<br>previous attempt] 0.33<br>[F, Index year suicidal thoughts]<br>0.49<br>[F, Non index year suicidal<br>thoughts] 0.49<br>[F, Acute post attempt period]<br>0.88<br>[F, Suicidal thoughts with<br>previous attempt] 0.61      | Derived from the National Survey of<br>Mental Health and Wellbeing, 2007.                                                                                         |
| Attempt relative risk from<br>support from people they<br>can rely on                           | extSSState,<br>Gender |                                                                                                                                                                                                                                                                                                                                                                                                   |                                                                                                                                                                   |
| Attempt relative risk from<br>seeking help at Emergency<br>Department                           |                       | 0.1                                                                                                                                                                                                                                                                                                                                                                                               | Default value assumes that the vast<br>majority of individuals in crisis who seek<br>stabilisation at hospital are successfully<br>stabilised prior to discharge. |
|                                                                                                 |                       | [M, Index year suicidal<br>thoughts] 0.098<br>[M, Non index year suicidal<br>thoughts] 0.096<br>[M, Acute post attempt period]<br>0.375<br>[M, Suicidal thoughts with<br>previous attempt] 0.69<br>[F, Index year suicidal thoughts]<br>0.4<br>[F, Non index year suicidal<br>thoughts] 0.036<br>[F, Acute post attempt period]<br>0.375<br>[F, Suicidal thoughts with<br>previous attempt] 0.935 | Estimated via model optimisation                                                                                                                                  |
| Base assumed risk of<br>attempt people<br>experiencing suicidal<br>thoughts                     | extSSState,<br>Gender |                                                                                                                                                                                                                                                                                                                                                                                                   |                                                                                                                                                                   |
|                                                                                                 |                       | [M, Index year suicidal<br>thoughts] 0.3<br>[M, Non index year suicidal<br>thoughts] 0.25<br>[M, Acute post attempt period]<br>0.3<br>[M, Suicidal thoughts with<br>previous attempt] 0.3<br>[F, Index year suicidal thoughts]<br>0.3<br>[F, Non index year suicidal<br>thoughts] 0.25                                                                                                            | Estimated via model optimisation and<br>stakeholder consultation                                                                                                  |
| Base probability people<br>experiencing suicidal<br>thoughts present to<br>Emergency Department | extSSState,<br>Gender |                                                                                                                                                                                                                                                                                                                                                                                                   |                                                                                                                                                                   |

|                                                                                             |                                      |                                                                                     |                                                                           |
|---------------------------------------------------------------------------------------------|--------------------------------------|-------------------------------------------------------------------------------------|---------------------------------------------------------------------------|
|                                                                                             |                                      | [F, Acute post attempt period]<br>0.45                                              |                                                                           |
|                                                                                             |                                      | [F, Suicidal thoughts with<br>previous attempt] 0.3                                 |                                                                           |
| Base probability of<br>experiencing >1 crisis per<br>year experiencing suicidal<br>thoughts | extSSState                           | [Index year suicidal thoughts]<br>0.5                                               | Estimated via model optimisation and<br>stakeholder consultation          |
|                                                                                             |                                      | [Non index year suicidal<br>thoughts] 0.5                                           |                                                                           |
|                                                                                             |                                      | [Acute post attempt period] 0.5<br>[Suicidal thoughts with<br>previous attempt] 0.6 |                                                                           |
| Base probability person<br>has >2 people they can<br>confide in 1                           | Remoteness,<br>extSSState,<br>Gender | [M, Major_Cities,<br>Index_year_suicidal thoughts,<br>Gender] 0.39                  | Derived from the National Survey of<br>Mental Health and Wellbeing, 2007. |
|                                                                                             |                                      | [M, Major_Cities,<br>Non_index_year_suicidal<br>thoughts, Gender] 0.39              |                                                                           |
|                                                                                             |                                      | [M, Major_Cities,<br>Acute_post_attempt_period,<br>Gender] 0.20                     |                                                                           |
|                                                                                             |                                      | [M, Major_Cities, Suicidal<br>thoughts_with_previous_attem<br>pt, Gender] 0.39      |                                                                           |
|                                                                                             |                                      | [M, Inner_Regional,<br>Index_year_suicidal thoughts,<br>Gender] 0.28                |                                                                           |
|                                                                                             |                                      | [M, Inner_Regional,<br>Non_index_year_suicidal<br>thoughts, Gender] 0.28            |                                                                           |
|                                                                                             |                                      | [M, Inner_Regional,<br>Acute_post_attempt_period,<br>Gender] 0.21                   |                                                                           |
|                                                                                             |                                      | [M, Inner_Regional, Suicidal<br>thoughts_with_previous_attem<br>pt, Gender] 0.41    |                                                                           |
|                                                                                             |                                      | [M, Other, Index_year_suicidal<br>thoughts, Gender] 0.33                            |                                                                           |
|                                                                                             |                                      | [M, Other,<br>Non_index_year_suicidal<br>thoughts, Gender] 0.33                     |                                                                           |
|                                                                                             |                                      | [M, Other,<br>Acute_post_attempt_period,<br>Gender] 0.21                            |                                                                           |
|                                                                                             |                                      | [M, Other, Suicidal<br>thoughts_with_previous_attem<br>pt, Gender] 0.40             |                                                                           |
|                                                                                             |                                      | [F, Major_Cities,<br>Index_year_suicidal thoughts,<br>Gender] 0.45                  |                                                                           |

|                                                                |                                      |                                                                                                                                                                                                                                                                                                                                                                                                                                                                                                                                                                                                                                                                                                                                                                                                                |                                                                           |
|----------------------------------------------------------------|--------------------------------------|----------------------------------------------------------------------------------------------------------------------------------------------------------------------------------------------------------------------------------------------------------------------------------------------------------------------------------------------------------------------------------------------------------------------------------------------------------------------------------------------------------------------------------------------------------------------------------------------------------------------------------------------------------------------------------------------------------------------------------------------------------------------------------------------------------------|---------------------------------------------------------------------------|
|                                                                |                                      | [F, Major_Cities,<br>Non_index_year_suicidal<br>thoughts, Gender] 0.45<br>[F, Major_Cities,<br>Acute_post_attempt_period,<br>Gender] 0.12<br>[F, Major_Cities, Suicidal<br>thoughts_with_previous_attem<br>pt, Gender] 0.36<br>[F, Inner_Regional,<br>Index_year_suicidal thoughts,<br>Gender] 0.32<br>[F, Inner_Regional,<br>Non_index_year_suicidal<br>thoughts, Gender] 0.32<br>[F, Inner_Regional,<br>Acute_post_attempt_period,<br>Gender] 0.33<br>[F, Inner_Regional, Suicidal<br>thoughts_with_previous_attem<br>pt, Gender] 0.16<br>[F, Other, Index_year_suicidal<br>thoughts, Gender] 0.66<br>[F, Other,<br>Non_index_year_suicidal<br>thoughts, Gender] 0.66<br>[F, Other,<br>Acute_post_attempt_period,<br>Gender] 0.33<br>[F, Other, Suicidal<br>thoughts_with_previous_attem<br>pt, Gender] 0.24 |                                                                           |
| Base probability person<br>has >2 people they can rely<br>on 1 | Remoteness,<br>extSSState,<br>Gender | [M, Major_Cities,<br>Index_year_suicidal thoughts,<br>Gender] 0.48<br>[M, Major_Cities,<br>Non_index_year_suicidal<br>thoughts, Gender] 0.48<br>[M, Major_Cities,<br>Acute_post_attempt_period,<br>Gender] 0.20<br>[M, Major_Cities, Suicidal<br>thoughts_with_previous_attem<br>pt, Gender] 0.50<br>[M, Inner_Regional,<br>Index_year_suicidal thoughts,<br>Gender] 0.29<br>[M, Inner_Regional,<br>Non_index_year_suicidal<br>thoughts, Gender] 0.29                                                                                                                                                                                                                                                                                                                                                          | Derived from the National Survey of<br>Mental Health and Wellbeing, 2007. |

---

[M, Inner\_Regional,  
Acute\_post\_attempt\_period,  
Gender] 0.23

[M, Inner\_Regional, Suicidal  
thoughts\_with\_previous\_attem  
pt, Gender] 0.46

[M, Other, Index\_year\_suicidal  
thoughts, Gender] 0.50

[M, Other,  
Non\_index\_year\_suicidal  
thoughts, Gender] 0.50

[M, Other,  
Acute\_post\_attempt\_period,  
Gender] 0.23

[M, Other, Suicidal  
thoughts\_with\_previous\_attem  
pt, Gender] 0.22

[F, Major\_Cities,  
Index\_year\_suicidal thoughts,  
Gender] 0.50

[F, Major\_Cities,  
Non\_index\_year\_suicidal  
thoughts, Gender] 0.50

[F, Major\_Cities,  
Acute\_post\_attempt\_period,  
Gender] 0.14

[F, Major\_Cities, Suicidal  
thoughts\_with\_previous\_attem  
pt, Gender] 0.50

[F, Inner\_Regional,  
Index\_year\_suicidal thoughts,  
Gender] 0.40

[F, Inner\_Regional,  
Non\_index\_year\_suicidal  
thoughts, Gender] 0.40

[F, Inner\_Regional,  
Acute\_post\_attempt\_period,  
Gender] 0.33

[F, Inner\_Regional, Suicidal  
thoughts\_with\_previous\_attem  
pt, Gender] 0.25

[F, Other, Index\_year\_suicidal  
thoughts, Gender] 0.72

[F, Other,  
Non\_index\_year\_suicidal  
thoughts, Gender] 0.66

[F, Other,  
Acute\_post\_attempt\_period,  
Gender] 0.33

---



|                                                             |                                           | [F, Other, Suicidal thoughts_with_previous_attempt, Gender] 0.24 |                                                                                                                                                                                                         |
|-------------------------------------------------------------|-------------------------------------------|------------------------------------------------------------------|---------------------------------------------------------------------------------------------------------------------------------------------------------------------------------------------------------|
| Percent reduction in risk from new crisis support           |                                           | 90%                                                              | Default value assumes that the effectiveness of new crisis support initiatives (SPOT and Alternatives to Emergency Department) are equally effective as Emergency Department-based crisis stabilisation |
| Assumed number of crisis/year for repeat crisis individuals | extSSState                                | 4                                                                | Estimated via model optimisation and stakeholder consultation                                                                                                                                           |
| <b>Non Acute and Community Service Sector</b>               |                                           |                                                                  |                                                                                                                                                                                                         |
| Model Parameter                                             | Arrayed by                                | Parameter Value                                                  | Notes                                                                                                                                                                                                   |
| Baseline percent adults with perceived need for information | SSState, Gender, Underlying mental health | [Ideator, M, Yes] 70%                                            | Derived from the National Survey of Mental Health and Wellbeing, 2007.                                                                                                                                  |
|                                                             |                                           | [Ideator, F, Yes] 85%                                            |                                                                                                                                                                                                         |
|                                                             |                                           | [Acute_Post, M, Yes] 95%                                         |                                                                                                                                                                                                         |
|                                                             |                                           | [Acute_Post, F, Yes] 75%                                         |                                                                                                                                                                                                         |
|                                                             |                                           | [Former, M, Yes] 85%                                             |                                                                                                                                                                                                         |
|                                                             |                                           | [Former, F, Yes] 75%                                             |                                                                                                                                                                                                         |
|                                                             |                                           | [None, M, Yes] 65%                                               |                                                                                                                                                                                                         |
|                                                             |                                           | [None, F, Yes] 70%                                               |                                                                                                                                                                                                         |
|                                                             |                                           | [Ideator, M, No] 25%                                             |                                                                                                                                                                                                         |
|                                                             |                                           | [Ideator, F, No] 60%                                             |                                                                                                                                                                                                         |
|                                                             |                                           | [Acute_Post, M, No] 95%                                          |                                                                                                                                                                                                         |
|                                                             |                                           | [Acute_Post, F, No] 75%                                          |                                                                                                                                                                                                         |
|                                                             |                                           | [Former, M, No] 30%                                              |                                                                                                                                                                                                         |
|                                                             |                                           | [Former, F, No] 30%                                              |                                                                                                                                                                                                         |
| Baseline percent adults with perceived need for medication  | SSState, Gender, Underlying mental health | [None, M, No] 40%                                                | Derived from the National Survey of Mental Health and Wellbeing, 2007.                                                                                                                                  |
|                                                             |                                           | [None, F, No] 40%                                                |                                                                                                                                                                                                         |
|                                                             |                                           | [Ideator, M, Yes] 65%                                            |                                                                                                                                                                                                         |
|                                                             |                                           | [Ideator, F, Yes] 75%                                            |                                                                                                                                                                                                         |
|                                                             |                                           | [Acute_Post, M, Yes] 55%                                         |                                                                                                                                                                                                         |
|                                                             |                                           | [Acute_Post, F, Yes] 80%                                         |                                                                                                                                                                                                         |
|                                                             |                                           | [Former, M, Yes] 60%                                             |                                                                                                                                                                                                         |
|                                                             |                                           | [Former, F, Yes] 65%                                             |                                                                                                                                                                                                         |
|                                                             |                                           | [None, M, Yes] 60%                                               |                                                                                                                                                                                                         |
|                                                             |                                           | [None, F, Yes] 65%                                               |                                                                                                                                                                                                         |
|                                                             |                                           | [Ideator, M, No] 55%                                             |                                                                                                                                                                                                         |
|                                                             |                                           | [Ideator, F, No] 75%                                             |                                                                                                                                                                                                         |
|                                                             |                                           | [Acute_Post, M, No] 55%                                          |                                                                                                                                                                                                         |
|                                                             |                                           | [Acute_Post, F, No] 80%                                          |                                                                                                                                                                                                         |
| Baseline percent adults with perceived need for therapy     | SSState, Gender, Underlying mental health | [Former, M, No] 80%                                              | Derived from the National Survey of Mental Health and Wellbeing, 2007.                                                                                                                                  |
|                                                             |                                           | [Former, F, No] 35%                                              |                                                                                                                                                                                                         |
|                                                             |                                           | [None, M, No] 55%                                                |                                                                                                                                                                                                         |
|                                                             |                                           | [None, F, No] 60%                                                |                                                                                                                                                                                                         |
|                                                             |                                           | [Ideator, M, Yes] 53%                                            |                                                                                                                                                                                                         |
|                                                             |                                           | [Ideator, F, Yes] 96%                                            |                                                                                                                                                                                                         |
|                                                             |                                           | [Acute_Post, M, Yes] 95%                                         |                                                                                                                                                                                                         |
|                                                             |                                           | [Acute_Post, F, Yes] 95%                                         |                                                                                                                                                                                                         |
|                                                             |                                           | [Former, M, Yes] 75%                                             |                                                                                                                                                                                                         |

|                                                                                                                          |                                          |                                                                                                                                                                                                                                                                                                                                                                                                  |                                                                        |
|--------------------------------------------------------------------------------------------------------------------------|------------------------------------------|--------------------------------------------------------------------------------------------------------------------------------------------------------------------------------------------------------------------------------------------------------------------------------------------------------------------------------------------------------------------------------------------------|------------------------------------------------------------------------|
|                                                                                                                          |                                          | [Former, F, Yes] 80%<br>[None, M, Yes] 53%<br>[None, F, Yes] 78%<br>[Ideator, M, No] 42%<br>[Ideator, F, No] 90%<br>[Acute_Post, M, No] 95%<br>[Acute_Post, F, No] 95%<br>[Former, M, No] 40%<br>[Former, F, No] 40%<br>[None, M, No] 42%<br>[None, F, No] 71%                                                                                                                                   |                                                                        |
| Baseline percent adults with perceived need for general support                                                          | SState, Gender, Underlying mental health | [Ideator, M, Yes] 15%<br>[Ideator, F, Yes] 40%<br>[Acute_Post, M, Yes] 85%<br>[Acute_Post, F, Yes] 45%<br>[Former, M, Yes] 40%<br>[Former, F, Yes] 45%<br>[None, M, Yes] 35%<br>[None, F, Yes] 30%<br>[Ideator, M, No] 10%<br>[Ideator, F, No] 55%<br>[Acute_Post, M, No] 85%<br>[Acute_Post, F, No] 45%<br>[Former, M, No] 20%<br>[Former, F, No] 20%<br>[None, M, No] 25%<br>[None, F, No] 20% | Derived from the National Survey of Mental Health and Wellbeing, 2007. |
| Baseline percent adults with perceived need for social support with suicidal thoughts                                    | SState, Gender, Underlying mental health | [Ideator, M, Yes] 45%<br>[Ideator, F, Yes] 45%<br>[Acute_Post, M, Yes] 85%<br>[Acute_Post, F, Yes] 50%<br>[Former, M, Yes] 65%<br>[Former, F, Yes] 45%<br>[None, M, Yes] 35%<br>[None, F, Yes] 25%<br>[Ideator, M, No] 35%<br>[Ideator, F, No] 40%<br>[Acute_Post, M, No] 85%<br>[Acute_Post, F, No] 50%<br>[Former, M, No] 10%<br>[Former, F, No] 10%<br>[None, M, No] 15%<br>[None, F, No] 20% | Derived from the National Survey of Mental Health and Wellbeing, 2007. |
| Baseline percent adult with suicidal thoughts accessing system able to access support for perceived need for information | SState, Gender, Underlying mental health | [Ideator, M, Yes] 90%<br>[Ideator, F, Yes] 75%<br>[Acute_Post, M, Yes] 90%<br>[Acute_Post, F, Yes] 90%<br>[Former, M, Yes] 85%<br>[Former, F, Yes] 90%<br>[None, M, Yes] 80%<br>[None, F, Yes] 75%                                                                                                                                                                                               | Derived from the National Survey of Mental Health and Wellbeing, 2007. |

|                                                                                                                             |                                                   |                                                                                                                                                                                                                                                                                                                                                                                                  |                                                                        |
|-----------------------------------------------------------------------------------------------------------------------------|---------------------------------------------------|--------------------------------------------------------------------------------------------------------------------------------------------------------------------------------------------------------------------------------------------------------------------------------------------------------------------------------------------------------------------------------------------------|------------------------------------------------------------------------|
|                                                                                                                             |                                                   | [Ideator, M, No] 60%<br>[Ideator, F, No] 65%<br>[Acute_Post, M, No] 90%<br>[Acute_Post, F, No] 90%<br>[Former, M, No] 35%<br>[Former, F, No] 35%<br>[None, M, No] 85%<br>[None, F, No] 85%                                                                                                                                                                                                       |                                                                        |
| Baseline percent adult with suicidal thoughts accessing system able to access support for perceived need for medication     | SState,<br>Gender,<br>Underlying<br>mental health | [Ideator, M, Yes] 90%<br>[Ideator, F, Yes] 90%<br>[Acute_Post, M, Yes] 95%<br>[Acute_Post, F, Yes] 95%<br>[Former, M, Yes] 95%<br>[Former, F, Yes] 95%<br>[None, M, Yes] 95%<br>[None, F, Yes] 95%<br>[Ideator, M, No] 95%<br>[Ideator, F, No] 95%<br>[Acute_Post, M, No] 95%<br>[Acute_Post, F, No] 95%<br>[Former, M, No] 95%<br>[Former, F, No] 95%<br>[None, M, No] 95%<br>[None, F, No] 95% | Derived from the National Survey of Mental Health and Wellbeing, 2007. |
| Baseline percent adult with suicidal thoughts accessing system able to access support for perceived need for therapy        | SState,<br>Gender,<br>Underlying<br>mental health | [Ideator, M, Yes] 90%<br>[Ideator, F, Yes] 78%<br>[Acute_Post, M, Yes] 95%<br>[Acute_Post, F, Yes] 90%<br>[Former, M, Yes] 95%<br>[Former, F, Yes] 90%<br>[None, M, Yes] 89%<br>[None, F, Yes] 87%<br>[Ideator, M, No] 90%<br>[Ideator, F, No] 58%<br>[Acute_Post, M, No] 95%<br>[Acute_Post, F, No] 90%<br>[Former, M, No] 85%<br>[Former, F, No] 85%<br>[None, M, No] 94%<br>[None, F, No] 91% | Derived from the National Survey of Mental Health and Wellbeing, 2007. |
| Baseline percent adult with suicidal thoughts accessing system able to access support for perceived need for social support | SState,<br>Gender,<br>Underlying<br>mental health | [Ideator, M, Yes] 70%<br>[Ideator, F, Yes] 70%<br>[Acute_Post, M, Yes] 80%<br>[Acute_Post, F, Yes] 55%<br>[Former, M, Yes] 50%<br>[Former, F, Yes] 60%<br>[None, M, Yes] 70%<br>[None, F, Yes] 85%<br>[Ideator, M, No] 95%<br>[Ideator, F, No] 95%<br>[Acute_Post, M, No] 80%                                                                                                                    | Derived from the National Survey of Mental Health and Wellbeing, 2007. |

|                                                                                                                              |                                                   |                                                                                                                                                                                                                                                                                                                                                                                                  |                                                                        |
|------------------------------------------------------------------------------------------------------------------------------|---------------------------------------------------|--------------------------------------------------------------------------------------------------------------------------------------------------------------------------------------------------------------------------------------------------------------------------------------------------------------------------------------------------------------------------------------------------|------------------------------------------------------------------------|
|                                                                                                                              |                                                   | [Acute_Post, F, No] 55%<br>[Former, M, No] 5%<br>[Former, F, No] 5%<br>[None, M, No] 65%<br>[None, F, No] 70%                                                                                                                                                                                                                                                                                    |                                                                        |
| Baseline percent adult with suicidal thoughts accessing system able to access support for perceived need for general support | SState,<br>Gender,<br>Underlying<br>mental health | [Ideator, M, Yes] 45%<br>[Ideator, F, Yes] 45%<br>[Acute_Post, M, Yes] 80%<br>[Acute_Post, F, Yes] 50%<br>[Former, M, Yes] 80%<br>[Former, F, Yes] 70%<br>[None, M, Yes] 65%<br>[None, F, Yes] 65%<br>[Ideator, M, No] 50%<br>[Ideator, F, No] 50%<br>[Acute_Post, M, No] 80%<br>[Acute_Post, F, No] 50%<br>[Former, M, No] 5%<br>[Former, F, No] 5%<br>[None, M, No] 75%<br>[None, F, No] 65%   |                                                                        |
| Baseline percent adult with suicidal thoughts accessing support for perceived need for information - needs fully met         | SState,<br>Gender,<br>Underlying<br>mental health | [Ideator, M, Yes] 65%<br>[Ideator, F, Yes] 50%<br>[Acute_Post, M, Yes] 50%<br>[Acute_Post, F, Yes] 80%<br>[Former, M, Yes] 50%<br>[Former, F, Yes] 50%<br>[None, M, Yes] 80%<br>[None, F, Yes] 80%<br>[Ideator, M, No] 35%<br>[Ideator, F, No] 35%<br>[Acute_Post, M, No] 50%<br>[Acute_Post, F, No] 80%<br>[Former, M, No] 35%<br>[Former, F, No] 35%<br>[None, M, No] 80%<br>[None, F, No] 85% | Derived from the National Survey of Mental Health and Wellbeing, 2007. |
| Baseline percent adult with suicidal thoughts accessing support for perceived need for medication - needs fully met          | SState,<br>Gender,<br>Underlying<br>mental health | [Ideator, M, Yes] 85%<br>[Ideator, F, Yes] 90%<br>[Acute_Post, M, Yes] 70%<br>[Acute_Post, F, Yes] 85%<br>[Former, M, Yes] 90%<br>[Former, F, Yes] 80%<br>[None, M, Yes] 94%<br>[None, F, Yes] 89%<br>[Ideator, M, No] 80%<br>[Ideator, F, No] 80%<br>[Acute_Post, M, No] 70%<br>[Acute_Post, F, No] 85%<br>[Former, M, No] 95%<br>[Former, F, No] 95%                                           | Derived from the National Survey of Mental Health and Wellbeing, 2007. |

|                                                                                                                       |                                          |                          |                                                                        |
|-----------------------------------------------------------------------------------------------------------------------|------------------------------------------|--------------------------|------------------------------------------------------------------------|
|                                                                                                                       |                                          | [None, M, No] 90%        |                                                                        |
|                                                                                                                       |                                          | [None, F, No] 92%        |                                                                        |
| Baseline percent adult with suicidal thoughts accessing support for perceived need for therapy - needs fully met      | SState, Gender, Underlying mental health | [Ideator, M, Yes] 40%    | Derived from the National Survey of Mental Health and Wellbeing, 2007. |
|                                                                                                                       |                                          | [Ideator, F, Yes] 81%    |                                                                        |
|                                                                                                                       |                                          | [Acute_Post, M, Yes] 70% |                                                                        |
|                                                                                                                       |                                          | [Acute_Post, F, Yes] 85% |                                                                        |
|                                                                                                                       |                                          | [Former, M, Yes] 85%     |                                                                        |
|                                                                                                                       |                                          | [Former, F, Yes] 65%     |                                                                        |
|                                                                                                                       |                                          | [None, M, Yes] 75%       |                                                                        |
|                                                                                                                       |                                          | [None, F, Yes] 80%       |                                                                        |
|                                                                                                                       |                                          | [Ideator, M, No] 41%     |                                                                        |
|                                                                                                                       |                                          | [Ideator, F, No] 90%     |                                                                        |
|                                                                                                                       |                                          | [Acute_Post, M, No] 70%  |                                                                        |
|                                                                                                                       |                                          | [Acute_Post, F, No] 85%  |                                                                        |
|                                                                                                                       |                                          | [Former, M, No] 95%      |                                                                        |
|                                                                                                                       |                                          | [Former, F, No] 95%      |                                                                        |
|                                                                                                                       |                                          | [None, M, No] 75%        |                                                                        |
|                                                                                                                       |                                          | [None, F, No] 85%        |                                                                        |
| Baseline percent with suicidal thoughts accessing support for perceived need for general support - needs fully met    | SState, Gender, Underlying mental health | [Ideator, M, Yes] 75%    | Derived from the National Survey of Mental Health and Wellbeing, 2007. |
|                                                                                                                       |                                          | [Ideator, F, Yes] 80%    |                                                                        |
|                                                                                                                       |                                          | [Acute_Post, M, Yes] 80% |                                                                        |
|                                                                                                                       |                                          | [Acute_Post, F, Yes] 60% |                                                                        |
|                                                                                                                       |                                          | [Former, M, Yes] 85%     |                                                                        |
|                                                                                                                       |                                          | [Former, F, Yes] 50%     |                                                                        |
|                                                                                                                       |                                          | [None, M, Yes] 75%       |                                                                        |
|                                                                                                                       |                                          | [None, F, Yes] 70%       |                                                                        |
|                                                                                                                       |                                          | [Ideator, M, No] 85%     |                                                                        |
|                                                                                                                       |                                          | [Ideator, F, No] 90%     |                                                                        |
|                                                                                                                       |                                          | [Acute_Post, M, No] 80%  |                                                                        |
|                                                                                                                       |                                          | [Acute_Post, F, No] 60%  |                                                                        |
| Baseline percent adult with suicidal thoughts accessing support for perceived need for social support needs fully met | SState, Gender, Underlying mental health | [Ideator, M, Yes] 70%    | Derived from the National Survey of Mental Health and Wellbeing, 2007. |
|                                                                                                                       |                                          | [Ideator, F, Yes] 85%    |                                                                        |
|                                                                                                                       |                                          | [Acute_Post, M, Yes] 70% |                                                                        |
|                                                                                                                       |                                          | [Acute_Post, F, Yes] 90% |                                                                        |
|                                                                                                                       |                                          | [Former, M, Yes] 75%     |                                                                        |
|                                                                                                                       |                                          | [Former, F, Yes] 85%     |                                                                        |
|                                                                                                                       |                                          | [None, M, Yes] 70%       |                                                                        |
|                                                                                                                       |                                          | [None, F, Yes] 85%       |                                                                        |
|                                                                                                                       |                                          | [Ideator, M, No] 70%     |                                                                        |
|                                                                                                                       |                                          | [Ideator, F, No] 70%     |                                                                        |
|                                                                                                                       |                                          | [Acute_Post, M, No] 70%  |                                                                        |
|                                                                                                                       |                                          | [Acute_Post, F, No] 90%  |                                                                        |
|                                                                                                                       |                                          | [Former, M, No] 5%       |                                                                        |
|                                                                                                                       |                                          | [Former, F, No] 5%       |                                                                        |
|                                                                                                                       |                                          | [None, M, No] 65%        |                                                                        |
|                                                                                                                       |                                          | [None, F, No] 70%        |                                                                        |

|                                                                                                       |                                          |                                                                                                                                                                                                                                                                                                                                                                                            |                                                                        |
|-------------------------------------------------------------------------------------------------------|------------------------------------------|--------------------------------------------------------------------------------------------------------------------------------------------------------------------------------------------------------------------------------------------------------------------------------------------------------------------------------------------------------------------------------------------|------------------------------------------------------------------------|
| Baseline percent adults with suicidal thoughts non- service users with perceived need for information | SState, Gender, Underlying mental health | [Ideator, M, Yes] 15%<br>[Ideator, F, Yes] 20%<br>[Acute_Post, M, Yes] 5%<br>[Acute_Post, F, Yes] 25%<br>[Former, M, Yes] 30%<br>[Former, F, Yes] 30%<br>[None, M, Yes] 5%<br>[None, F, Yes] 5%<br>[Ideator, M, No] 8%<br>[Ideator, F, No] 8%<br>[Acute_Post, M, No] 5%<br>[Acute_Post, F, No] 25%<br>[Former, M, No] 8%<br>[Former, F, No] 8%<br>[None, M, No] 1%<br>[None, F, No] 1%     | Derived from the National Survey of Mental Health and Wellbeing, 2007. |
| Baseline percent adults with suicidal thoughts non- service users with perceived need for medication  | SState, Gender, Underlying mental health | [Ideator, M, Yes] 12%<br>[Ideator, F, Yes] 5%<br>[Acute_Post, M, Yes] 55%<br>[Acute_Post, F, Yes] 25%<br>[Former, M, Yes] 10%<br>[Former, F, Yes] 10%<br>[None, M, Yes] 2%<br>[None, F, Yes] 1%<br>[Ideator, M, No] 1%<br>[Ideator, F, No] 5%<br>[Acute_Post, M, No] 55%<br>[Acute_Post, F, No] 25%<br>[Former, M, No] 5%<br>[Former, F, No] 5%<br>[None, M, No] 0%<br>[None, F, No] 0%    | Derived from the National Survey of Mental Health and Wellbeing, 2007. |
| Baseline percent adults with suicidal thoughts non- service users with perceived need for therapy     | SState, Gender, Underlying mental health | [Ideator, M, Yes] 20%<br>[Ideator, F, Yes] 40%<br>[Acute_Post, M, Yes] 60%<br>[Acute_Post, F, Yes] 60%<br>[Former, M, Yes] 40%<br>[Former, F, Yes] 40%<br>[None, M, Yes] 5%<br>[None, F, Yes] 10%<br>[Ideator, M, No] 8%<br>[Ideator, F, No] 17%<br>[Acute_Post, M, No] 60%<br>[Acute_Post, F, No] 60%<br>[Former, M, No] 0%<br>[Former, F, No] 0%<br>[None, M, No] 1%<br>[None, F, No] 1% | Derived from the National Survey of Mental Health and Wellbeing, 2007. |
| Baseline percent adults with suicidal thoughts non- service users with                                | SState, Gender,                          | [Ideator, M, Yes] 18%<br>[Ideator, F, Yes] 20%<br>[Acute_Post, M, Yes] 50%                                                                                                                                                                                                                                                                                                                 | Derived from the National Survey of Mental Health and Wellbeing, 2007. |

|                                                                                                                                                |                                          |                                                                                                                                                                                                                                                                                                                                                                                                |                                                                                                                                                                                                                                            |
|------------------------------------------------------------------------------------------------------------------------------------------------|------------------------------------------|------------------------------------------------------------------------------------------------------------------------------------------------------------------------------------------------------------------------------------------------------------------------------------------------------------------------------------------------------------------------------------------------|--------------------------------------------------------------------------------------------------------------------------------------------------------------------------------------------------------------------------------------------|
| perceived need for social support                                                                                                              | Underlying mental health                 | [Acute_Post, F, Yes] 50%<br>[Former, M, Yes] 23%<br>[Former, F, Yes] 23%<br>[None, M, Yes] 5%<br>[None, F, Yes] 5%<br>[Ideator, M, No] 8%<br>[Ideator, F, No] 8%<br>[Acute_Post, M, No] 50%<br>[Acute_Post, F, No] 50%<br>[Former, M, No] 1%<br>[Former, F, No] 1%<br>[None, M, No] 0%<br>[None, F, No] 0%                                                                                     |                                                                                                                                                                                                                                            |
| Baseline percent non-service users with perceived need for general support                                                                     | SState, Gender, Underlying mental health | [Ideator, M, Yes] 15%<br>[Ideator, F, Yes] 15%<br>[Acute_Post, M, Yes] 50%<br>[Acute_Post, F, Yes] 50%<br>[Former, M, Yes] 25%<br>[Former, F, Yes] 25%<br>[None, M, Yes] 5%<br>[None, F, Yes] 5%<br>[Ideator, M, No] 7%<br>[Ideator, F, No] 8%<br>[Acute_Post, M, No] 50%<br>[Acute_Post, F, No] 50%<br>[Former, M, No] 1%<br>[Former, F, No] 1%<br>[None, M, No] 0%<br>[None, F, No] 0%       | Derived from the National Survey of Mental Health and Wellbeing, 2007.                                                                                                                                                                     |
| Baseline assumed percent of people who are referred outpatient mental health support                                                           | SState, Gender, Underlying mental health | [Ideator, M, Yes] 50%<br>[Ideator, F, Yes] 55%<br>[Acute_Post, M, Yes] 57%<br>[Acute_Post, F, Yes] 62%<br>[Former, M, Yes] 57%<br>[Former, F, Yes] 62%<br>[None, M, Yes] 50%<br>[None, F, Yes] 50%<br>[Ideator, M, No] 50%<br>[Ideator, F, No] 55%<br>[Acute_Post, M, No] 57%<br>[Acute_Post, F, No] 62%<br>[Former, M, No] 57%<br>[Former, F, No] 62%<br>[None, M, No] 0%<br>[None, F, No] 0% | Derived from the National Survey of Mental Health and Wellbeing, 2007.                                                                                                                                                                     |
| Baseline assumed percent of people with suicidal thoughts or suicidal behaviours referred to suicide-specific connection or aftercare services | Sstate                                   | [Ideator] 60%<br>[Acute_Post] 70%<br>[Former] 60%<br>[None] 0%                                                                                                                                                                                                                                                                                                                                 | Derived from Carter G, McGill K, Sawyer L, Whyte I. The NSW Way Back Support Service (Hunter): Process & Effectiveness Outcomes Evaluation Report. 2019 and Stapelberg NJ, Sveticic J, Hughes I, Almeida-Crasto A, Gae-Atefi T, Gill N, et |



|                                                                  |                             |                                             |                                                                           |
|------------------------------------------------------------------|-----------------------------|---------------------------------------------|---------------------------------------------------------------------------|
|                                                                  |                             | [Major_Cities, Ideator, M, Yes]<br>84%      |                                                                           |
|                                                                  |                             | [Major_Cities, Ideator, F, Yes]<br>95%      |                                                                           |
|                                                                  |                             | [Major_Cities, Acute_Post, M,<br>Yes] 67%   |                                                                           |
|                                                                  |                             | [Major_Cities, Acute_Post, F,<br>Yes] 88%   |                                                                           |
|                                                                  |                             | [Major_Cities, Former, M, Yes]<br>89%       |                                                                           |
|                                                                  |                             | [Major_Cities, Former, F, Yes]<br>96%       |                                                                           |
|                                                                  |                             | [Major_Cities, None, M, Yes]<br>79%         |                                                                           |
|                                                                  |                             | [Major_Cities, None, F, Yes] 90%            |                                                                           |
|                                                                  |                             | [Inner_Regional, Ideator, M,<br>Yes] 68%    |                                                                           |
|                                                                  |                             | [Inner_Regional, Ideator, F, Yes]<br>83%    |                                                                           |
|                                                                  |                             | [Inner_Regional, Acute_Post, M,<br>Yes] 77% |                                                                           |
| Percent adults<br>experiencing suicidal<br>thoughts see their GP | RemotenessSS                | [Inner_Regional, Acute_Post, F,<br>Yes] 93% | Derived from the National Survey of<br>Mental Health and Wellbeing, 2007. |
|                                                                  | Underlying<br>mental health | [Inner_Regional, Former, M,<br>Yes] 77%     |                                                                           |
|                                                                  |                             | [Inner_Regional, Former, F, Yes]<br>93%     |                                                                           |
|                                                                  |                             | [Inner_Regional, None, M, Yes]<br>79%       |                                                                           |
|                                                                  |                             | [Inner_Regional, None, F, Yes]<br>86%       |                                                                           |
|                                                                  |                             | [Other, Ideator, M, Yes] 76%                |                                                                           |
|                                                                  |                             | [Other, Ideator, F, Yes] 83%                |                                                                           |
|                                                                  |                             | [Other, Acute_Post, M, Yes] 67%             |                                                                           |
|                                                                  |                             | [Other, Acute_Post, F, Yes] 88%             |                                                                           |
|                                                                  |                             | [Other, Former, M, Yes] 77%                 |                                                                           |
|                                                                  |                             | [Other, Former, F, Yes] 93%                 |                                                                           |
|                                                                  |                             | [Other, None, M, Yes] 86%                   |                                                                           |
|                                                                  |                             | [Other, None, F, Yes] 92%                   |                                                                           |
|                                                                  |                             | [Major_Cities, Ideator, M, No]<br>85%       |                                                                           |
|                                                                  |                             | [Major_Cities, Ideator, F, No]<br>96%       |                                                                           |
|                                                                  |                             | [Major_Cities, Acute_Post, M,<br>No] 67%    |                                                                           |
|                                                                  |                             | [Major_Cities, Acute_Post, F,               |                                                                           |

|                            |               |                                   |  |
|----------------------------|---------------|-----------------------------------|--|
|                            |               | No] 88%                           |  |
|                            |               | [Major_Cities, Former, M, No]     |  |
|                            |               | 50%                               |  |
|                            |               | [Major_Cities, Former, F, No]     |  |
|                            |               | 85%                               |  |
|                            |               | [Major_Cities, None, M, No]       |  |
|                            |               | 75%                               |  |
|                            |               | [Major_Cities, None, F, No] 86%   |  |
|                            |               | [Inner_Regional, Ideator, M, No]  |  |
|                            |               | 80%                               |  |
|                            |               | [Inner_Regional, Ideator, F, No]  |  |
|                            |               | 83%                               |  |
|                            |               | [Inner_Regional, Acute_Post, M,   |  |
|                            |               | No] 66%                           |  |
|                            |               | [Inner_Regional, Acute_Post, F,   |  |
|                            |               | No] 92%                           |  |
|                            |               | [Inner_Regional, Former, M,       |  |
|                            |               | No] 66%                           |  |
|                            |               | [Inner_Regional, Former, F, No]   |  |
|                            |               | 92%                               |  |
|                            |               | [Inner_Regional, None, M, No]     |  |
|                            |               | 73%                               |  |
|                            |               | [Inner_Regional, None, F, No]     |  |
|                            |               | 83%                               |  |
|                            |               | [Other, Ideator, M, No] 59%       |  |
|                            |               | [Other, Ideator, F, No] 83%       |  |
|                            |               | [Other, Acute_Post, M, No] 67%    |  |
|                            |               | [Other, Acute_Post, F, No] 88%    |  |
|                            |               | [Other, Former, M, No] 66%        |  |
|                            |               | [Other, Former, F, No] 92%        |  |
|                            |               | [Other, None, M, No] 74%          |  |
|                            |               | [Other, None, F, No] 82%          |  |
|                            |               | [Major_Cities, Ideator, M, Yes]   |  |
|                            |               | 48%                               |  |
|                            |               | [Major_Cities, Ideator, F, Yes]   |  |
|                            |               | 46%                               |  |
|                            |               | [Major_Cities, Acute_Post, M,     |  |
|                            |               | Yes] 45%                          |  |
|                            |               | [Major_Cities, Acute_Post, F,     |  |
|                            |               | Yes] 70%                          |  |
| Percent Adults             | RemotenessSS  | [Major_Cities, Former, M, Yes]    |  |
| experiencing suicidal      | tate, Gender, | 67%                               |  |
| thoughts see their GP and  | Underlying    | [Major_Cities, Former, F, Yes]    |  |
| seek mental health support | mental health | 59%                               |  |
|                            |               | [Major_Cities, None, M, Yes]      |  |
|                            |               | 20%                               |  |
|                            |               | [Major_Cities, None, F, Yes] 29%  |  |
|                            |               | [Inner_Regional, Ideator, M,      |  |
|                            |               | Yes] 66%                          |  |
|                            |               | [Inner_Regional, Ideator, F, Yes] |  |
|                            |               | 73%                               |  |

Derived from the National Survey of  
Mental Health and Wellbeing, 2007.

---

[Inner\_Regional, Acute\_Post, M, Yes] 45%

[Inner\_Regional, Acute\_Post, F, Yes] 70%

[Inner\_Regional, Former, M, Yes] 60%

[Inner\_Regional, Former, F, Yes] 78%

[Inner\_Regional, None, M, Yes] 24%

[Inner\_Regional, None, F, Yes] 29%

[Other, Ideator, M, Yes] 48%

[Other, Ideator, F, Yes] 78%

[Other, Acute\_Post, M, Yes] 45%

[Other, Acute\_Post, F, Yes] 70%

[Other, Former, M, Yes] 60%

[Other, Former, F, Yes] 78%

[Other, None, M, Yes] 15%

[Other, None, F, Yes] 29%

---

[Major\_Cities, Ideator, M, No] 13%

[Major\_Cities, Ideator, F, No] 34%

[Major\_Cities, Acute\_Post, M, No] 45%

[Major\_Cities, Acute\_Post, F, No] 70%

[Major\_Cities, Former, M, No] 90%

[Major\_Cities, Former, F, No] 81%

[Major\_Cities, None, M, No] 3%

[Major\_Cities, None, F, No] 6%

[Inner\_Regional, Ideator, M, No] 33%

[Inner\_Regional, Ideator, F, No] 60%

[Inner\_Regional, Acute\_Post, M, No] 45%

[Inner\_Regional, Acute\_Post, F, No] 70%

[Inner\_Regional, Former, M, No] 61%

[Inner\_Regional, Former, F, No] 78%

[Inner\_Regional, None, M, No] 6%

[Inner\_Regional, None, F, No] 4%

[Other, Ideator, M, No] 57%

[Other, Ideator, F, No] 60%

---

|                                                                                                                             |                                          |                                                                                                                                                                                                                                                                                                                                                                                                                                  |                                                                                                                                                         |
|-----------------------------------------------------------------------------------------------------------------------------|------------------------------------------|----------------------------------------------------------------------------------------------------------------------------------------------------------------------------------------------------------------------------------------------------------------------------------------------------------------------------------------------------------------------------------------------------------------------------------|---------------------------------------------------------------------------------------------------------------------------------------------------------|
|                                                                                                                             |                                          | [Other, Acute_Post, M, No] 45%<br>[Other, Acute_Post, F, No] 70%<br>[Other, Former, M, No] 61%<br>[Other, Former, F, No] 78%<br>[Other, None, M, No] 5%<br>[Other, None, F, No] 3%                                                                                                                                                                                                                                               |                                                                                                                                                         |
| Percent to hospital post attempt                                                                                            | Gender                                   | [M] 50%<br>[F] 75%                                                                                                                                                                                                                                                                                                                                                                                                               | Estimated via model optimisation                                                                                                                        |
| Percent who do not complete aftercare                                                                                       |                                          | 50%                                                                                                                                                                                                                                                                                                                                                                                                                              | Derived from Carter G, McGill K, Sawyer L, Whyte I. The NSW Way Back Support Service (Hunter): Process & Effectiveness Outcomes Evaluation Report. 2019 |
| Percent with underlying mental health by SState                                                                             | SState, Gender                           | [M, Ideator] 62%<br>[M, Acute_Post] 95%<br>[M, Former] 84%<br>[M, None] 18%<br>[F, Ideator] 80%<br>[F, Acute_Post] 95%<br>[F, Former] 81%<br>[F, None] 23%                                                                                                                                                                                                                                                                       | Derived from the National Survey of Mental Health and Wellbeing, 2007.                                                                                  |
| Percent adults experiencing suicidal thoughts referred to community-based care by GP                                        | SState, Gender, Underlying mental health | [Ideator, M, Yes] 46.0%<br>[Ideator, F, Yes] 51.0%<br>[Acute_Post, M, Yes] 45.0%<br>[Acute_Post, F, Yes] 45.0%<br>[Former, M, Yes] 67.0%<br>[Former, F, Yes] 51.0%<br>[None, M, Yes] 33.0%<br>[None, F, Yes] 40.0%<br>[Ideator, M, No] 15.0%<br>[Ideator, F, No] 40.0%<br>[Acute_Post, M, No] 45.0%<br>[Acute_Post, F, No] 45.0%<br>[Former, M, No] 90.0%<br>[Former, F, No] 90.0%<br>[None, M, No] 15.0%<br>[None, F, No] 16.0% | Derived from the National Survey of Mental Health and Wellbeing, 2007.                                                                                  |
| Percent adults experiencing suicidal thoughts see their GP for physical reasons but still get onward mental health referral | SState, Gender, Underlying mental health | [Ideator, M, Yes] 9.0%<br>[Ideator, F, Yes] 8.0%<br>[Acute_Post, M, Yes] 18.0%<br>[Acute_Post, F, Yes] 10.0%<br>[Former, M, Yes] 20.0%<br>[Former, F, Yes] 20.0%<br>[None, M, Yes] 2.8%<br>[None, F, Yes] 2.5%<br>[Ideator, M, No] 0.0%<br>[Ideator, F, No] 0.0%<br>[Acute_Post, M, No] 18.0%<br>[Acute_Post, F, No] 10.0%<br>[Former, M, No] 0.0%<br>[Former, F, No] 0.0%<br>[None, M, No] 0.3%                                 | Derived from the National Survey of Mental Health and Wellbeing, 2007.                                                                                  |

|                                                                                                                                                          |                                  |                                                                    |                                                                                                                                                                                                                                             |
|----------------------------------------------------------------------------------------------------------------------------------------------------------|----------------------------------|--------------------------------------------------------------------|---------------------------------------------------------------------------------------------------------------------------------------------------------------------------------------------------------------------------------------------|
|                                                                                                                                                          |                                  | [None, F, No] 0.6% 0.09                                            |                                                                                                                                                                                                                                             |
| Annual growth in Allied mental health practitioners                                                                                                      | Remoteness                       | [Big Cities] 0.015<br>[Inner Regional] 0.01<br>[Other] 0.01        | Estimated from Australian Institute for Health and Wellbeing Mental health services in Australia – Mental health workforce data 2018                                                                                                        |
| Assumed percent of engaged cases in outpatient mental health support where support does not facilitate connection to community-based care                |                                  | 59%                                                                | Estimated via model optimisation and Spittal MJ, Shand F, Christensen H, Brophy L, Pirkis J. Community mental health care after self-harm: A retrospective cohort study. Australian & New Zealand Journal of Psychiatry. 2016;51(7):727-35. |
| Assumed percent of engaged cases in suicide specific aftercare where support does not facilitate connection to community-based care                      |                                  | 11%                                                                | Derived from Carter G, McGill K, Sawyer L, Whyte I. The NSW Way Back Support Service (Hunter): Process & Effectiveness Outcomes Evaluation Report. 2019 - considering the number of users who only engaged with the service for a few days. |
| Assumed percent of people who do not engage with connection service                                                                                      |                                  | 20%                                                                | Derived from Carter G, McGill K, Sawyer L, Whyte I. The NSW Way Back Support Service (Hunter): Process & Effectiveness Outcomes Evaluation Report. 2019                                                                                     |
| Assumed percent referrals from Gatekeeper to see GP                                                                                                      |                                  | 50%                                                                |                                                                                                                                                                                                                                             |
| Assumed baseline percent people connected though existing Community Mental Health Care channels no suicidal thoughts suicidal behaviours                 | Gender, Underlying mental health | [M, Yes] 6.5%<br>[F, Yes] 9.0%<br>[M, No] 0.8%<br>[Y, No] 1.5%     | Derived from the National Survey of Mental Health and Wellbeing, 2007 and estimated using model optimisation                                                                                                                                |
| Assumed baseline percent people connected though existing Community Mental Health Care channels post attempt acute                                       | Gender, Underlying mental health | [M, Yes] 45.0%<br>[F, Yes] 28.0%<br>[M, No] 45.0%<br>[Y, No] 28.0% | Derived from the National Survey of Mental Health and Wellbeing, 2007 and estimated using model optimisation                                                                                                                                |
| Assumed baseline percent people connected though existing Community Mental Health Care channels repeat suicidal thoughts with suicidal behaviour history | Gender, Underlying mental health | [M, Yes] 30.0%<br>[F, Yes] 10.0%<br>[M, No] 34.0%<br>[Y, No] 16.0% | Derived from the National Survey of Mental Health and Wellbeing, 2007 and estimated using model optimisation                                                                                                                                |
| Assumed baseline percent people connected though existing Community Mental Health Care channels suicidal thoughts no suicidal behaviour                  | Gender, Underlying mental health | [M, Yes] 9.0%<br>[F, Yes] 14.0%<br>[M, No] 3.8%<br>[Y, No] 6.5%    | Derived from the National Survey of Mental Health and Wellbeing, 2007 and estimated using model optimisation                                                                                                                                |

|                                                                         |            |                                                          |                                                                                                                                                                                                                                                                                             |
|-------------------------------------------------------------------------|------------|----------------------------------------------------------|---------------------------------------------------------------------------------------------------------------------------------------------------------------------------------------------------------------------------------------------------------------------------------------------|
| Average length of care for community-based care                         |            | 13 weeks                                                 | Derived from Munasinghe S, Page A, Mannan H, Ferdousi S, Peek B. Determinants of treatment disengagement among those at risk of suicide referred to primary mental health care services in Western Sydney, Australia. Australian & New Zealand Journal of Psychiatry.0(0):0004867420963738. |
| Average weeks of GP mental health support                               |            | 16 weeks                                                 | Assumes care length provided by GPs is slightly longer than care provided by non-GP community services                                                                                                                                                                                      |
| Background new patients per mental health service provider per year     |            | 60                                                       | Estimated via stakeholder consultation                                                                                                                                                                                                                                                      |
| GP mental health referral Geography multiplier                          | Remoteness | [Big Cities] 1<br>[Inner Regional] 1<br>[Other] 0.8      | Derived from the National Survey of Mental Health and Wellbeing, 2007                                                                                                                                                                                                                       |
| GP physical only Geography multiplier                                   | Remoteness | [Big Cities] 1.2<br>[Inner Regional] 0.6<br>[Other] 0.8  | Derived from the National Survey of Mental Health and Wellbeing, 2007                                                                                                                                                                                                                       |
| Initial count of Allied mental health practitioners in NSW              | Remoteness | [Big Cities] 2750<br>[Inner Regional] 600<br>[Other] 115 | Derived from the National Survey of Mental Health and Wellbeing, 2007                                                                                                                                                                                                                       |
| Percent disengage per week                                              |            | 10%                                                      | Derived from Munasinghe S, Page A, Mannan H, Ferdousi S, Peek B. Determinants of treatment disengagement among those at risk of suicide referred to primary mental health care services in Western Sydney, Australia. Australian & New Zealand Journal of Psychiatry.0(0):0004867420963738. |
| Population background percent exposed to perceived need for information |            | [Major_Cities, Ideator, M, Yes]<br>72.9%                 | Derived from the National Survey of Mental Health and Wellbeing, 2007                                                                                                                                                                                                                       |
|                                                                         |            | [Major_Cities, Ideator, F, Yes]<br>96.4%                 |                                                                                                                                                                                                                                                                                             |
|                                                                         |            | [Major_Cities, Acute_Post, M, Yes] 89.7%                 |                                                                                                                                                                                                                                                                                             |
|                                                                         |            | [Major_Cities, Acute_Post, F, Yes] 69.9%                 |                                                                                                                                                                                                                                                                                             |
|                                                                         |            | [Major_Cities, Former, M, Yes]<br>89.3%                  |                                                                                                                                                                                                                                                                                             |
|                                                                         |            | [Major_Cities, Former, F, Yes]<br>69.5%                  |                                                                                                                                                                                                                                                                                             |
|                                                                         |            | [Major_Cities, None, M, Yes]<br>0.0%                     |                                                                                                                                                                                                                                                                                             |
|                                                                         |            | [Major_Cities, None, F, Yes]<br>0.0%                     |                                                                                                                                                                                                                                                                                             |
|                                                                         |            | [Inner_Regional, Ideator, M, Yes] 54.2%                  |                                                                                                                                                                                                                                                                                             |
|                                                                         |            | [Inner_Regional, Ideator, F, Yes]<br>76.7%               |                                                                                                                                                                                                                                                                                             |

---

[Inner\_Regional, Acute\_Post, M, Yes] 91.4%

[Inner\_Regional, Acute\_Post, F, Yes] 70.3%

[Inner\_Regional, Former, M, Yes] 53.0%

[Inner\_Regional, Former, F, Yes] 47.3%

[Inner\_Regional, None, M, Yes] 0.0%

[Inner\_Regional, None, F, Yes] 0.0%

[Other, Ideator, M, Yes] 54.4%

[Other, Ideator, F, Yes] 81.9%

[Other, Acute\_Post, M, Yes] 89.0%

[Other, Acute\_Post, F, Yes] 70.6%

[Other, Former, M, Yes] 53.6%

[Other, Former, F, Yes] 47.6%

[Other, None, M, Yes] 0.0%

[Other, None, F, Yes] 0.0%

---

[Major\_Cities, Ideator, M, No] 23.7%

[Major\_Cities, Ideator, F, No] 47.7%

[Major\_Cities, Acute\_Post, M, No] 88.5%

[Major\_Cities, Acute\_Post, F, No] 69.9%

[Major\_Cities, Former, M, No] 28.5%

[Major\_Cities, Former, F, No] 29.4%

[Major\_Cities, None, M, No] 0.0%

[Major\_Cities, None, F, No] 0.0%

[Inner\_Regional, Ideator, M, No] 17.6%

[Inner\_Regional, Ideator, F, No] 41.5%

[Inner\_Regional, Acute\_Post, M, No] 89.1%

[Inner\_Regional, Acute\_Post, F, No] 70.2%

[Inner\_Regional, Former, M, No] 18.0%

[Inner\_Regional, Former, F, No] 19.6%

[Inner\_Regional, None, M, No]

---

Derived from the National Survey of  
Mental Health and Wellbeing, 2007



|                                                                                 |                                                                  |                                               |                                                                          |
|---------------------------------------------------------------------------------|------------------------------------------------------------------|-----------------------------------------------|--------------------------------------------------------------------------|
|                                                                                 |                                                                  | 0.0%                                          |                                                                          |
|                                                                                 |                                                                  | [Inner_Regional, None, F, No]                 |                                                                          |
|                                                                                 |                                                                  | 0.0%                                          |                                                                          |
|                                                                                 |                                                                  | [Other, Ideator, M, No] 18.5%                 |                                                                          |
|                                                                                 |                                                                  | [Other, Ideator, F, No] 43.2%                 |                                                                          |
|                                                                                 |                                                                  | [Other, Acute_Post, M, No]                    |                                                                          |
|                                                                                 |                                                                  | 88.4%                                         |                                                                          |
|                                                                                 |                                                                  | [Other, Acute_Post, F, No]                    |                                                                          |
|                                                                                 |                                                                  | 70.4%                                         |                                                                          |
|                                                                                 |                                                                  | [Other, Former, M, No] 18.0%                  |                                                                          |
|                                                                                 |                                                                  | [Other, Former, F, No] 19.5%                  |                                                                          |
|                                                                                 |                                                                  | [Other, None, M, No] 0.0%                     |                                                                          |
|                                                                                 |                                                                  | [Other, None, F, No] 0.0%                     |                                                                          |
| Population background<br>percent exposed to<br>perceived need for<br>medication | Remoteness<br>SSState,<br>Gender,<br>Underlying<br>mental health | [Major_Cities, Ideator, M, Yes]               | Derived from the National Survey of<br>Mental Health and Wellbeing, 2007 |
|                                                                                 |                                                                  | 39.4%                                         |                                                                          |
|                                                                                 |                                                                  | [Major_Cities, Ideator, F, Yes]               |                                                                          |
|                                                                                 |                                                                  | 46.7%                                         |                                                                          |
|                                                                                 |                                                                  | [Major_Cities, Acute_Post, M,<br>Yes] 55.4%   |                                                                          |
|                                                                                 |                                                                  | [Major_Cities, Acute_Post, F,<br>Yes] 73.6%   |                                                                          |
|                                                                                 |                                                                  | [Major_Cities, Former, M, Yes]                |                                                                          |
|                                                                                 |                                                                  | 60.5%                                         |                                                                          |
|                                                                                 |                                                                  | [Major_Cities, Former, F, Yes]                |                                                                          |
|                                                                                 |                                                                  | 54.4%                                         |                                                                          |
|                                                                                 |                                                                  | [Major_Cities, None, M, Yes]                  |                                                                          |
|                                                                                 |                                                                  | 0.0%                                          |                                                                          |
|                                                                                 |                                                                  | [Major_Cities, None, F, Yes]                  |                                                                          |
|                                                                                 |                                                                  | 0.0%                                          |                                                                          |
|                                                                                 |                                                                  | [Inner_Regional, Ideator, M,<br>Yes] 46.0%    |                                                                          |
|                                                                                 |                                                                  | [Inner_Regional, Ideator, F, Yes]             |                                                                          |
|                                                                                 |                                                                  | 60.7%                                         |                                                                          |
|                                                                                 |                                                                  | [Inner_Regional, Acute_Post, M,<br>Yes] 56.5% |                                                                          |
|                                                                                 |                                                                  | [Inner_Regional, Acute_Post, F,<br>Yes] 77.0% |                                                                          |
|                                                                                 |                                                                  | [Inner_Regional, Former, M,<br>Yes] 42.0%     |                                                                          |
|                                                                                 |                                                                  | [Inner_Regional, Former, F, Yes]              |                                                                          |
|                                                                                 |                                                                  | 44.6%                                         |                                                                          |
|                                                                                 |                                                                  | [Inner_Regional, None, M, Yes]                |                                                                          |
|                                                                                 |                                                                  | 0.0%                                          |                                                                          |
|                                                                                 |                                                                  | [Inner_Regional, None, F, Yes]                |                                                                          |
|                                                                                 |                                                                  | 0.0%                                          |                                                                          |
|                                                                                 |                                                                  | [Other, Ideator, M, Yes] 12.5%                |                                                                          |
|                                                                                 |                                                                  | [Other, Ideator, F, Yes] 33.2%                |                                                                          |
|                                                                                 |                                                                  | [Other, Acute_Post, M, Yes]                   |                                                                          |
|                                                                                 |                                                                  | 55.5%                                         |                                                                          |
|                                                                                 |                                                                  | [Other, Acute_Post, F, Yes]                   |                                                                          |
|                                                                                 |                                                                  | 73.6%                                         |                                                                          |

|                                                                                          |                                                              |                                                                                                                                                                                                                                                                                                                                                                                                                                                                                                                                                                                                                                                                                                                                                                                                                                                                                                                                                         |                                                                          |
|------------------------------------------------------------------------------------------|--------------------------------------------------------------|---------------------------------------------------------------------------------------------------------------------------------------------------------------------------------------------------------------------------------------------------------------------------------------------------------------------------------------------------------------------------------------------------------------------------------------------------------------------------------------------------------------------------------------------------------------------------------------------------------------------------------------------------------------------------------------------------------------------------------------------------------------------------------------------------------------------------------------------------------------------------------------------------------------------------------------------------------|--------------------------------------------------------------------------|
|                                                                                          |                                                              | [Other, Former, M, Yes] 71.0%<br>[Other, Former, F, Yes] 32.7%<br>[Other, None, M, Yes] 0.0%<br>[Other, None, F, Yes] 0.0%                                                                                                                                                                                                                                                                                                                                                                                                                                                                                                                                                                                                                                                                                                                                                                                                                              |                                                                          |
|                                                                                          |                                                              | [Major_Cities, Ideator, M, No]<br>20.3%[Major_Cities, Ideator, F,<br>No] 47.7%[Major_Cities,<br>Acute_Post, M, No]<br>56.6%[Major_Cities, Acute_Post,<br>F, No] 76.8%[Major_Cities,<br>Former, M, No]<br>53.6%[Major_Cities, Former, F,<br>No] 26.5%[Major_Cities, None,<br>M, No] 0.0%[Major_Cities,<br>None, F, No]<br>0.0%[Inner_Regional, Ideator,<br>M, No] 23.8%[Inner_Regional,<br>Ideator, F, No]<br>48.4%[Inner_Regional,<br>Acute_Post, M, No]<br>55.9%[Inner_Regional,<br>Acute_Post, F, No]<br>76.9%[Inner_Regional, Former,<br>M, No] 55.2%[Inner_Regional,<br>Former, F, No]<br>26.9%[Inner_Regional, None, M,<br>No] 0.0%[Inner_Regional, None,<br>F, No] 0.0%<br>[Other, Ideator, M, No] 12.5%<br>[Other, Ideator, F, No] 33.2%<br>[Other, Acute_Post, M, No]<br>55.5%<br>[Other, Acute_Post, F, No]<br>73.6%<br>[Other, Former, M, No] 71.0%<br>[Other, Former, F, No] 32.7%<br>[Other, None, M, No] 0.0%<br>[Other, None, F, No] 0.0% | Derived from the National Survey of<br>Mental Health and Wellbeing, 2007 |
| Population background<br>percent exposed to<br>perceived need for<br>situational support | RemotenessSS<br>tate, Gender,<br>Underlying<br>mental health | [Major_Cities, Ideator, M, Yes]<br>14.6%<br>[Major_Cities, Ideator, F, Yes]<br>28.0%<br>[Major_Cities, Acute_Post, M,<br>Yes] 84.9%<br>[Major_Cities, Acute_Post, F,<br>Yes] 46.0%<br>[Major_Cities, Former, M, Yes]<br>41.5%<br>[Major_Cities, Former, F, Yes]<br>42.1%<br>[Major_Cities, None, M, Yes]                                                                                                                                                                                                                                                                                                                                                                                                                                                                                                                                                                                                                                                | Derived from the National Survey of<br>Mental Health and Wellbeing, 2007 |

|  |                                      |       |
|--|--------------------------------------|-------|
|  | 0.0%                                 |       |
|  | [Major_Cities, None, F, Yes]         |       |
|  | 0.0%                                 |       |
|  | [Inner_Regional, Ideator, M, Yes]    | 14.7% |
|  | [Inner_Regional, Ideator, F, Yes]    | 37.8% |
|  | [Inner_Regional, Acute_Post, M, Yes] | 80.3% |
|  | [Inner_Regional, Acute_Post, F, Yes] | 43.1% |
|  | [Inner_Regional, Former, M, Yes]     | 32.2% |
|  | [Inner_Regional, Former, F, Yes]     | 34.8% |
|  | [Inner_Regional, None, M, Yes]       | 0.0%  |
|  | [Inner_Regional, None, F, Yes]       | 0.0%  |
|  | [Other, Ideator, M, Yes]             | 13.9% |
|  | [Other, Ideator, F, Yes]             | 37.9% |
|  | [Other, Acute_Post, M, Yes]          | 79.7% |
|  | [Other, Acute_Post, F, Yes]          | 42.7% |
|  | [Other, Former, M, Yes]              | 33.0% |
|  | [Other, Former, F, Yes]              | 35.3% |
|  | [Other, None, M, Yes]                | 0.0%  |
|  | [Other, None, F, Yes]                | 0.0%  |
|  | [Major_Cities, Ideator, M, No]       | 8.0%  |
|  | [Major_Cities, Ideator, F, No]       | 25.2% |
|  | [Major_Cities, Acute_Post, M, No]    | 84.5% |
|  | [Major_Cities, Acute_Post, F, No]    | 46.0% |
|  | [Major_Cities, Former, M, No]        | 17.6% |
|  | [Major_Cities, Former, F, No]        | 18.3% |
|  | [Major_Cities, None, M, No]          | 0.0%  |
|  | [Major_Cities, None, F, No]          | 0.0%  |
|  | [Inner_Regional, Ideator, M, No]     | 7.4%  |
|  | [Inner_Regional, Ideator, F, No]     | 40.1% |
|  | [Inner_Regional, Acute_Post, M, No]  | 79.6% |

Derived from the National Survey of  
Mental Health and Wellbeing, 2007

|                                                                            |                                                              |  |                                                                                                                                                                                                                                                                                                                                                                                                                                                                                                                                                                                                                                                                                                                                                                                                                                                                     |                                                                       |
|----------------------------------------------------------------------------|--------------------------------------------------------------|--|---------------------------------------------------------------------------------------------------------------------------------------------------------------------------------------------------------------------------------------------------------------------------------------------------------------------------------------------------------------------------------------------------------------------------------------------------------------------------------------------------------------------------------------------------------------------------------------------------------------------------------------------------------------------------------------------------------------------------------------------------------------------------------------------------------------------------------------------------------------------|-----------------------------------------------------------------------|
|                                                                            |                                                              |  | [Inner_Regional, Acute_Post, F, No] 43.2%<br>[Inner_Regional, Former, M, No] 13.5%<br>[Inner_Regional, Former, F, No] 15.1%<br>[Inner_Regional, None, M, No] 0.0%<br>[Inner_Regional, None, F, No] 0.0%<br>[Other, Ideator, M, No] 7.8%<br>[Other, Ideator, F, No] 39.3%<br>[Other, Acute_Post, M, No] 79.5%<br>[Other, Acute_Post, F, No] 42.8%<br>[Other, Former, M, No] 13.8%<br>[Other, Former, F, No] 15.2%<br>[Other, None, M, No] 0.0%<br>[Other, None, F, No] 0.0%                                                                                                                                                                                                                                                                                                                                                                                          |                                                                       |
|                                                                            |                                                              |  | [Major_Cities, Ideator, M, Yes] 35.1%<br>[Major_Cities, Ideator, F, Yes] 37.8%<br>[Major_Cities, Acute_Post, M, Yes] 83.7%<br>[Major_Cities, Acute_Post, F, Yes] 49.8%<br>[Major_Cities, Former, M, Yes] 69.1%<br>[Major_Cities, Former, F, Yes] 43.4%<br>[Major_Cities, None, M, Yes] 0.0%<br>[Major_Cities, None, F, Yes] 0.0%<br>[Inner_Regional, Ideator, M, Yes] 26.5%<br>[Inner_Regional, Ideator, F, Yes] 32.2%<br>[Inner_Regional, Acute_Post, M, Yes] 83.7%<br>[Inner_Regional, Acute_Post, F, Yes] 49.5%<br>[Inner_Regional, Former, M, Yes] 43.5%<br>[Inner_Regional, Former, F, Yes] 30.5%<br>[Inner_Regional, None, M, Yes] 0.0%<br>[Inner_Regional, None, F, Yes] 0.0%<br>[Other, Ideator, M, Yes] 23.6%<br>[Other, Ideator, F, Yes] 32.1%<br>[Other, Acute_Post, M, Yes] 82.5%<br>[Other, Acute_Post, F, Yes] 49.0%<br>[Other, Former, M, Yes] 45.6% |                                                                       |
| Population background percent exposed to perceived need for social support | RemotenessSS<br>tate, Gender,<br>Underlying<br>mental health |  |                                                                                                                                                                                                                                                                                                                                                                                                                                                                                                                                                                                                                                                                                                                                                                                                                                                                     | Derived from the National Survey of Mental Health and Wellbeing, 2007 |

|                            |               |                                  |                                     |
|----------------------------|---------------|----------------------------------|-------------------------------------|
|                            |               | [Other, Former, F, Yes] 31.3%    |                                     |
|                            |               | [Other, None, M, Yes] 0.0%       |                                     |
|                            |               | [Other, None, F, Yes] 0.0%       |                                     |
|                            |               | <hr/>                            |                                     |
|                            |               | [Major_Cities, Ideator, M, No]   |                                     |
|                            |               | 15.0%                            |                                     |
|                            |               | [Major_Cities, Ideator, F, No]   |                                     |
|                            |               | 22.8%                            |                                     |
|                            |               | [Major_Cities, Acute_Post, M,    |                                     |
|                            |               | No] 83.3%                        |                                     |
|                            |               | [Major_Cities, Acute_Post, F,    |                                     |
|                            |               | No] 49.9%                        |                                     |
|                            |               | [Major_Cities, Former, M, No]    |                                     |
|                            |               | 9.3%                             |                                     |
|                            |               | [Major_Cities, Former, F, No]    |                                     |
|                            |               | 9.6%                             |                                     |
|                            |               | [Major_Cities, None, M, No]      |                                     |
|                            |               | 0.0%                             |                                     |
|                            |               | [Major_Cities, None, F, No]      |                                     |
|                            |               | 0.0%                             |                                     |
|                            |               | [Inner_Regional, Ideator, M, No] |                                     |
|                            |               | 13.3%                            |                                     |
|                            |               | [Inner_Regional, Ideator, F, No] |                                     |
|                            |               | 22.4%                            |                                     |
|                            |               | [Inner_Regional, Acute_Post, M,  |                                     |
|                            |               | No] 83.0%                        | Derived from the National Survey of |
|                            |               | [Inner_Regional, Acute_Post, F,  | Mental Health and Wellbeing, 2007   |
|                            |               | No] 49.6%                        |                                     |
|                            |               | [Inner_Regional, Former, M,      |                                     |
|                            |               | No] 6.1%                         |                                     |
|                            |               | [Inner_Regional, Former, F, No]  |                                     |
|                            |               | 6.8%                             |                                     |
|                            |               | [Inner_Regional, None, M, No]    |                                     |
|                            |               | 0.0%                             |                                     |
|                            |               | [Inner_Regional, None, F, No]    |                                     |
|                            |               | 0.0%                             |                                     |
|                            |               | [Other, Ideator, M, No] 14.9%    |                                     |
|                            |               | [Other, Ideator, F, No] 21.8%    |                                     |
|                            |               | [Other, Acute_Post, M, No]       |                                     |
|                            |               | 82.3%                            |                                     |
|                            |               | [Other, Acute_Post, F, No]       |                                     |
|                            |               | 49.0%                            |                                     |
|                            |               | [Other, Former, M, No] 6.4%      |                                     |
|                            |               | [Other, Former, F, No] 7.0%      |                                     |
|                            |               | [Other, None, M, No] 0.0%        |                                     |
|                            |               | [Other, None, F, No] 0.0%        |                                     |
|                            |               | <hr/>                            |                                     |
| Population background      | Remoteness    | [Major_Cities, Ideator, M, Yes]  |                                     |
| percent exposed to         | SState,       | 38.1%                            |                                     |
| perceived need for therapy | Gender,       | [Major_Cities, Ideator, F, Yes]  | Derived from the National Survey of |
|                            | Underlying    | 74.8%                            | Mental Health and Wellbeing, 2007   |
|                            | mental health | [Major_Cities, Acute_Post, M,    |                                     |
|                            |               | Yes] 94.0%                       |                                     |
|                            |               | <hr/>                            |                                     |

---

[Major\_Cities, Acute\_Post, F, Yes] 91.4%  
 [Major\_Cities, Former, M, Yes] 79.1%  
 [Major\_Cities, Former, F, Yes] 75.7%  
 [Major\_Cities, None, M, Yes] 0.0%  
 [Major\_Cities, None, F, Yes] 0.0%  
 [Inner\_Regional, Ideator, M, Yes] 38.8%  
 [Inner\_Regional, Ideator, F, Yes] 80.5%  
 [Inner\_Regional, Acute\_Post, M, Yes] 93.3%  
 [Inner\_Regional, Acute\_Post, F, Yes] 90.9%  
 [Inner\_Regional, Former, M, Yes] 46.9%  
 [Inner\_Regional, Former, F, Yes] 50.7%  
 [Inner\_Regional, None, M, Yes] 0.0%  
 [Inner\_Regional, None, F, Yes] 0.0%  
 [Other, Ideator, M, Yes] 37.5%  
 [Other, Ideator, F, Yes] 82.7%  
 [Other, Acute\_Post, M, Yes] 92.1%  
 [Other, Acute\_Post, F, Yes] 90.6%  
 [Other, Former, M, Yes] 46.1%  
 [Other, Former, F, Yes] 50.2%  
 [Other, None, M, Yes] 0.0%  
 [Other, None, F, Yes] 0.0%

---

[Major\_Cities, Ideator, M, No] 15.0%  
 [Major\_Cities, Ideator, F, No] 47.9%  
 [Major\_Cities, Acute\_Post, M, No] 93.7%  
 [Major\_Cities, Acute\_Post, F, No] 91.4%  
 [Major\_Cities, Former, M, No] 35.7%  
 [Major\_Cities, Former, F, No] 37.2%  
 [Major\_Cities, None, M, No] 0.0%  
 [Major\_Cities, None, F, No] 0.0%  
 [Inner\_Regional, Ideator, M, No] 19.1%  
 [Inner\_Regional, Ideator, F, No] 57.4%  
 [Inner\_Regional,

---

Derived from the National Survey of  
 Mental Health and Wellbeing, 2007

|                                                                                                                                          |                |                                                                                                                                                                                                                                                                                                                                                                                                                                                                                                                   |                                                                       |
|------------------------------------------------------------------------------------------------------------------------------------------|----------------|-------------------------------------------------------------------------------------------------------------------------------------------------------------------------------------------------------------------------------------------------------------------------------------------------------------------------------------------------------------------------------------------------------------------------------------------------------------------------------------------------------------------|-----------------------------------------------------------------------|
|                                                                                                                                          |                | Acute_Post, M, No]<br>92.5%[Inner_Regional,<br>Acute_Post, F, No]<br>90.8%[Inner_Regional, Former,<br>M, No] 21.6%[Inner_Regional,<br>Former, F, No]<br>24.4%[Inner_Regional, None, M,<br>No] 0.0%[Inner_Regional, None,<br>F, No] 0.0%<br>[Other, Ideator, M, No] 21.1%<br>[Other, Ideator, F, No] 58.0%<br>[Other, Acute_Post, M, No]<br>91.9%<br>[Other, Acute_Post, F, No]<br>90.6%<br>[Other, Former, M, No] 20.9%<br>[Other, Former, F, No] 23.7%<br>[Other, None, M, No] 0.0%<br>[Other, None, F, No] 0.0% |                                                                       |
| Probability of suicidal thoughts with needs met                                                                                          | SState, Gender | [M, Ideator] 10.8%<br>[M, Acute_Post] 17.2%<br>[M, Former] 12.1%<br>[M, None] 100.0%<br>[F, Ideator] 11.2%<br>[F, Acute_Post] 16.4%<br>[F, Former] 10.3%<br>[F, None] 100.0%                                                                                                                                                                                                                                                                                                                                      | Derived from the National Survey of Mental Health and Wellbeing, 2007 |
| Probability of suicidal thoughts with no need                                                                                            | SState, Gender | [M, Ideator] 9.3%<br>[M, Acute_Post] 11.9%<br>[M, Former] 7.8%<br>[M, None] 100.0%<br>[F, Ideator] 9.2%<br>[F, Acute_Post] 12.1%<br>[F, Former] 10.3%<br>[F, None] 100.0%                                                                                                                                                                                                                                                                                                                                         | Derived from the National Survey of Mental Health and Wellbeing, 2007 |
| Probability of suicidal thoughts with outstanding needs                                                                                  | SState, Gender | [M, Ideator] 18.6%<br>[M, Acute_Post] 64.6%<br>[M, Former] 51.7%<br>[M, None] 100.0%<br>[F, Ideator] 34.9%<br>[F, Acute_Post] 42.2%<br>[F, Former] 78.1%<br>[F, None] 100.0%                                                                                                                                                                                                                                                                                                                                      | Derived from the National Survey of Mental Health and Wellbeing, 2007 |
| Regional multiplier - Baseline percent adult with suicidal thoughts accessing support for perceived need for information needs fully met | SState, Gender | [Major_Cities, Ideator] 0.75<br>[Major_Cities, Acute_Post] 0.95<br>[Major_Cities, Former] 0.87<br>[Major_Cities, None] 1.05<br>[Inner_Regional, Ideator] 0.87<br>[Inner_Regional, Acute_Post]<br>1.12<br>[Inner_Regional, Former] 1.46                                                                                                                                                                                                                                                                            | Derived from the National Survey of Mental Health and Wellbeing, 2007 |

|                                                                                                                                                               |                   |                                                                                                                                                                                                                                                                                                                                                                       |                                                                          |
|---------------------------------------------------------------------------------------------------------------------------------------------------------------|-------------------|-----------------------------------------------------------------------------------------------------------------------------------------------------------------------------------------------------------------------------------------------------------------------------------------------------------------------------------------------------------------------|--------------------------------------------------------------------------|
|                                                                                                                                                               |                   | [Inner_Regional, None] 1.46<br>[Other, Ideator] 0.87<br>[Other, Acute_Post] 1.12<br>[Other, Former] 1.46<br>[Other, None] 1.46                                                                                                                                                                                                                                        |                                                                          |
| Regional multiplier -<br>Baseline percent adult with<br>suicidal thoughts accessing<br>support for perceived need<br>for medication needs fully<br>met        | SState,<br>Gender | [Major_Cities, Ideator] 1.01<br>[Major_Cities, Acute_Post] 1.00<br>[Major_Cities, Former] 1.01<br>[Major_Cities, None] 0.99<br>[Inner_Regional, Ideator] 0.99<br>[Inner_Regional, Acute_Post] 0.99<br>[Inner_Regional, Former] 0.94<br>[Inner_Regional, None] 0.94<br>[Other, Ideator] 0.99<br>[Other, Acute_Post] 0.99<br>[Other, Former] 0.94<br>[Other, None] 0.94 | Derived from the National Survey of<br>Mental Health and Wellbeing, 2007 |
| Regional multiplier -<br>Baseline percent adult with<br>suicidal thoughts accessing<br>support for perceived need<br>for practical support needs<br>fully met | SState,<br>Gender | [Major_Cities, Ideator] 1.05<br>[Major_Cities, Acute_Post] 0.95<br>[Major_Cities, Former] 0.97<br>[Major_Cities, None] 1.05<br>[Inner_Regional, Ideator] 0.93<br>[Inner_Regional, Acute_Post] 1.13<br>[Inner_Regional, Former] 1.09<br>[Inner_Regional, None] 1.09<br>[Other, Ideator] 0.93<br>[Other, Acute_Post] 1.13<br>[Other, Former] 1.09<br>[Other, None] 1.09 | Derived from the National Survey of<br>Mental Health and Wellbeing, 2007 |
| Regional multiplier -<br>Baseline percent adult with<br>suicidal thoughts accessing<br>support for perceived need<br>for social support needs<br>fully met    | SState,<br>Gender | [Major_Cities, Ideator] 1.13<br>[Major_Cities, Acute_Post] 1.06<br>[Major_Cities, Former] 1.04<br>[Major_Cities, None] 1.01<br>[Inner_Regional, Ideator] 0.86<br>[Inner_Regional, Acute_Post] 0.87<br>[Inner_Regional, Former] 0.89<br>[Inner_Regional, None] 0.89<br>[Other, Ideator] 0.86<br>[Other, Acute_Post] 0.87<br>[Other, Former] 0.89<br>[Other, None] 0.89 | Derived from the National Survey of<br>Mental Health and Wellbeing, 2007 |
| Regional multiplier -<br>Baseline percent adult with<br>suicidal thoughts accessing<br>support for perceived need<br>for therapy needs fully met              | SState,<br>Gender | [Major_Cities, Ideator] 0.99<br>[Major_Cities, Acute_Post] 0.89<br>[Major_Cities, Former] 0.98<br>[Major_Cities, None] 1.00<br>[Inner_Regional, Ideator] 1.01<br>[Inner_Regional, Acute_Post] 1.32                                                                                                                                                                    | Derived from the National Survey of<br>Mental Health and Wellbeing, 2007 |



|                                                                                                                                                                     |                   |                                                                                                                                                                                                                                                                                                                                                                       |                                                                          |
|---------------------------------------------------------------------------------------------------------------------------------------------------------------------|-------------------|-----------------------------------------------------------------------------------------------------------------------------------------------------------------------------------------------------------------------------------------------------------------------------------------------------------------------------------------------------------------------|--------------------------------------------------------------------------|
|                                                                                                                                                                     |                   | [Inner_Regional, Former] 1.07<br>[Inner_Regional, None] 1.07<br>[Other, Ideator] 1.01<br>[Other, Acute_Post] 1.32<br>[Other, Former] 1.07<br>[Other, None] 1.07                                                                                                                                                                                                       |                                                                          |
| Regional multiplier -<br>Baseline percent adult with<br>suicidal thoughts accessing<br>system able to access<br>support for perceived need<br>for information       | SState,<br>Gender | [Major_Cities, Ideator] 1.00<br>[Major_Cities, Acute_Post] 0.96<br>[Major_Cities, Former] 1.00<br>[Major_Cities, None] 1.06<br>[Inner_Regional, Ideator] 0.86<br>[Inner_Regional, Acute_Post] 1.12<br>[Inner_Regional, Former] 0.99<br>[Inner_Regional, None] 0.99<br>[Other, Ideator] 0.86<br>[Other, Acute_Post] 1.12<br>[Other, Former] 0.99<br>[Other, None] 0.99 | Derived from the National Survey of<br>Mental Health and Wellbeing, 2007 |
| Regional multiplier -<br>Baseline percent adult with<br>suicidal thoughts accessing<br>system able to access<br>support for perceived need<br>for medication        | SState,<br>Gender | [Major_Cities, Ideator] 1.00<br>[Major_Cities, Acute_Post] 0.96<br>[Major_Cities, Former] 1.00<br>[Major_Cities, None] 1.06<br>[Inner_Regional, Ideator] 0.86<br>[Inner_Regional, Acute_Post] 1.12<br>[Inner_Regional, Former] 0.99<br>[Inner_Regional, None] 0.99<br>[Other, Ideator] 0.86<br>[Other, Acute_Post] 1.12<br>[Other, Former] 0.99<br>[Other, None] 0.99 | Derived from the National Survey of<br>Mental Health and Wellbeing, 2007 |
| Regional multiplier -<br>Baseline percent adult with<br>suicidal thoughts accessing<br>system able to access<br>support for perceived need<br>for practical support | SState,<br>Gender | [Major_Cities, Ideator] 1.08<br>[Major_Cities, Acute_Post] 0.96<br>[Major_Cities, Former] 0.99<br>[Major_Cities, None] 0.90<br>[Inner_Regional, Ideator] 0.90<br>[Inner_Regional, Acute_Post] 1.12<br>[Inner_Regional, Former] 1.04<br>[Inner_Regional, None] 1.04<br>[Other, Ideator] 0.90<br>[Other, Acute_Post] 1.12<br>[Other, Former] 1.04<br>[Other, None] 1.04 | Derived from the National Survey of<br>Mental Health and Wellbeing, 2007 |
| Regional multiplier -<br>Baseline percent adult with<br>suicidal thoughts accessing<br>system able to access<br>support for perceived need<br>for social support    | SState,<br>Gender | [Major_Cities, Ideator] 0.83<br>[Major_Cities, Acute_Post] 0.92<br>[Major_Cities, Former] 0.93<br>[Major_Cities, None] 1.10<br>[Inner_Regional, Ideator] 1.30<br>[Inner_Regional, Acute_Post]                                                                                                                                                                         | Derived from the National Survey of<br>Mental Health and Wellbeing, 2007 |

|                                                                                                                            |                   |                                                                                                                                                                                                                                                                                                                                                                       |                                                                          |
|----------------------------------------------------------------------------------------------------------------------------|-------------------|-----------------------------------------------------------------------------------------------------------------------------------------------------------------------------------------------------------------------------------------------------------------------------------------------------------------------------------------------------------------------|--------------------------------------------------------------------------|
|                                                                                                                            |                   | 1.22<br>[Inner_Regional, Former] 1.26<br>[Inner_Regional, None] 1.26<br>[Other, Ideator] 1.30<br>[Other, Acute_Post] 1.22<br>[Other, Former] 1.26<br>[Other, None] 1.26                                                                                                                                                                                               |                                                                          |
| Regional multiplier -<br>Baseline percent adults<br>with perceived need for<br>medication with suicidal<br>thoughts        | SState,<br>Gender | [Major_Cities, Ideator] 0.98<br>[Major_Cities, Acute_Post] 0.98<br>[Major_Cities, Former] 1.11<br>[Major_Cities, None] 0.92<br>[Inner_Regional, Ideator] 1.03<br>[Inner_Regional, Acute_Post] 1.07<br>[Inner_Regional, Former] 0.76<br>[Inner_Regional, None] 0.76<br>[Other, Ideator] 1.03<br>[Other, Acute_Post] 1.07<br>[Other, Former] 0.76<br>[Other, None] 0.76 | Derived from the National Survey of<br>Mental Health and Wellbeing, 2007 |
| Regional multiplier -<br>Baseline percent adults<br>with perceived need for<br>practical support with<br>suicidal thoughts | SState,<br>Gender | Major_Cities, Ideator] 0.82<br>[Major_Cities, Acute_Post] 1.01<br>[Major_Cities, Former] 1.11<br>[Major_Cities, None] 1.14<br>[Inner_Regional, Ideator] 1.33<br>[Inner_Regional, Acute_Post] 0.97<br>[Inner_Regional, Former] 0.78<br>[Inner_Regional, None] 0.78<br>[Other, Ideator] 1.33<br>[Other, Acute_Post] 0.97<br>[Other, Former] 0.78<br>[Other, None] 0.78  | Derived from the National Survey of<br>Mental Health and Wellbeing, 2007 |
| Regional multiplier -<br>Baseline percent adults<br>with perceived need for<br>social support with<br>suicidal thoughts    | SState,<br>Gender | [Major_Cities, Ideator] 0.98<br>[Major_Cities, Acute_Post] 0.99<br>[Major_Cities, Former] 1.17<br>[Major_Cities, None] 1.26<br>[Inner_Regional, Ideator] 1.04<br>[Inner_Regional, Acute_Post] 1.03<br>[Inner_Regional, Former] 0.64<br>[Inner_Regional, None] 0.64<br>[Other, Ideator] 1.04<br>[Other, Acute_Post] 1.03<br>[Other, Former] 0.64<br>[Other, None] 0.64 | Derived from the National Survey of<br>Mental Health and Wellbeing, 2007 |
| Regional multiplier -<br>Baseline percent adults<br>with perceived need for<br>therapy with suicidal<br>thoughts           | SState,<br>Gender | [Major_Cities, Ideator] 1.02<br>[Major_Cities, Acute_Post] 0.99<br>[Major_Cities, Former] 1.12<br>[Major_Cities, None] 1.02<br>[Inner_Regional, Ideator] 0.96                                                                                                                                                                                                         | Derived from the National Survey of<br>Mental Health and Wellbeing, 2007 |

|                                                                                                                                                 |                   |                                                                                                                                                                                                                                                                                                                                                                          |                                                                          |
|-------------------------------------------------------------------------------------------------------------------------------------------------|-------------------|--------------------------------------------------------------------------------------------------------------------------------------------------------------------------------------------------------------------------------------------------------------------------------------------------------------------------------------------------------------------------|--------------------------------------------------------------------------|
|                                                                                                                                                 |                   | [Inner_Regional, Acute_Post]<br>1.03<br>[Inner_Regional, Former] 0.75<br>[Inner_Regional, None] 0.75<br>[Other, Ideator] 0.96<br>[Other, Acute_Post] 1.03<br>[Other, Former] 0.75<br>[Other, None] 0.75                                                                                                                                                                  |                                                                          |
| Regional multiplier -<br>Baseline percent adults<br>with suicidal thoughts non<br>service users with<br>perceived need for<br>information       | SState,<br>Gender | [Major_Cities, Ideator] 2.72<br>[Major_Cities, Acute_Post] 1.14<br>[Major_Cities, Former] 1.03<br>[Major_Cities, None] 0.43<br>[Inner_Regional, Ideator] 1.85<br>[Inner_Regional, Acute_Post]<br>1.00<br>[Inner_Regional, Former] 0.77<br>[Inner_Regional, None] 0.77<br>[Other, Ideator] 1.85<br>[Other, Acute_Post] 1.00<br>[Other, Former] 0.77<br>[Other, None] 0.77 | Derived from the National Survey of<br>Mental Health and Wellbeing, 2007 |
| Regional multiplier -<br>Baseline percent adults<br>with suicidal thoughts non<br>service users with<br>perceived need for<br>medication        | SState,<br>Gender | [Major_Cities, Ideator] 0.89<br>[Major_Cities, Acute_Post] 1.14<br>[Major_Cities, Former] 0.99<br>[Major_Cities, None] 0.97<br>[Inner_Regional, Ideator] 1.29<br>[Inner_Regional, Acute_Post]<br>1.00<br>[Inner_Regional, Former] 1.05<br>[Inner_Regional, None] 1.05<br>[Other, Ideator] 1.29<br>[Other, Acute_Post] 1.00<br>[Other, Former] 1.05<br>[Other, None] 1.05 | Derived from the National Survey of<br>Mental Health and Wellbeing, 2007 |
| Regional multiplier -<br>Baseline percent adults<br>with suicidal thoughts non<br>service users with<br>perceived need for<br>practical support | SState,<br>Gender | [Major_Cities, Ideator] 1.12<br>[Major_Cities, Acute_Post] 1.14<br>[Major_Cities, Former] 0.99<br>[Major_Cities, None] 0.99<br>[Inner_Regional, Ideator] 0.70<br>[Inner_Regional, Acute_Post]<br>1.00<br>[Inner_Regional, Former] 1.04<br>[Inner_Regional, None] 1.04<br>[Other, Ideator] 0.70<br>[Other, Acute_Post] 1.00<br>[Other, Former] 1.04<br>[Other, None] 1.04 | Derived from the National Survey of<br>Mental Health and Wellbeing, 2007 |
| Regional multiplier -<br>Baseline percent adults<br>with suicidal thoughts non<br>service users with                                            | SState,<br>Gender | [Major_Cities, Ideator] 1.22<br>[Major_Cities, Acute_Post] 1.14<br>[Major_Cities, Former] 0.99<br>[Major_Cities, None] 0.87                                                                                                                                                                                                                                              | Derived from the National Survey of<br>Mental Health and Wellbeing, 2007 |

|                                                                                                                        |                |                                                                                                                                                                                                                                                                                                                                                                       |                                                                       |
|------------------------------------------------------------------------------------------------------------------------|----------------|-----------------------------------------------------------------------------------------------------------------------------------------------------------------------------------------------------------------------------------------------------------------------------------------------------------------------------------------------------------------------|-----------------------------------------------------------------------|
| perceived need for social support                                                                                      |                | [Inner_Regional, Ideator] 0.44<br>[Inner_Regional, Acute_Post] 1.00<br>[Inner_Regional, Former] 1.04<br>[Inner_Regional, None] 1.04<br>[Other, Ideator] 0.44<br>[Other, Acute_Post] 1.00<br>[Other, Former] 1.04<br>[Other, None] 1.04                                                                                                                                |                                                                       |
| Regional multiplier - Baseline percent adults with suicidal thoughts non service users with perceived need for therapy | SState, Gender | [Major_Cities, Ideator] 0.96<br>[Major_Cities, Acute_Post] 1.14<br>[Major_Cities, Former] 1.06<br>[Major_Cities, None] 0.89<br>[Inner_Regional, Ideator] 1.10<br>[Inner_Regional, Acute_Post] 1.00<br>[Inner_Regional, Former] 0.60<br>[Inner_Regional, None] 0.60<br>[Other, Ideator] 1.10<br>[Other, Acute_Post] 1.00<br>[Other, Former] 0.60<br>[Other, None] 0.60 | Derived from the National Survey of Mental Health and Wellbeing, 2007 |

#### Economics Sector

| Model Parameter                                                                      | Arrayed by | Parameter Value    | Notes                                                                                                                                          |
|--------------------------------------------------------------------------------------|------------|--------------------|------------------------------------------------------------------------------------------------------------------------------------------------|
| Percent people with attempt in the labour force full time                            | Gender     | [M] 46%<br>[F] 43% | Australian Bureau of Statistics 6202.0 - Labour Force, Australia, June 2020                                                                    |
| Percent of people with attempt in the labour force part time                         | Gender     | [M] 1%<br>[F] 14%  | Assumed                                                                                                                                        |
| Percent of people with suicidal thoughts in the labour force full time               | Gender     | [M] 50%<br>[F] 52% | Assumed                                                                                                                                        |
| Percent of people with suicidal thoughts in the labour force part time               | Gender     | [M] 2%<br>[F] 6.5% | Assumed                                                                                                                                        |
| Percent Emergency Department presentations with attempt requiring ambulance transfer |            | 55.0%              | Derived from Turning Point (2019) Beyond the Emergency: A national study of ambulance responses to men's mental health. Richmond, Victoria     |
| Percent Emergency Department presentations with attempt requiring police presence    |            | 48.0%              | Derived from Turning Point (2019) Beyond the Emergency: A national study of ambulance responses to men's mental health. Richmond, Victoria     |
| Percent Emergency Department presentations with attempt requiring                    |            | 25.0%              | Derived from Perera, Jayashanki, et al. "Presentations to NSW emergency departments with self-harm, suicidal suicidal thoughts, or intentional |

|                                                                                                                             |       |                                                                                                                                                                                                                                                                                                        |
|-----------------------------------------------------------------------------------------------------------------------------|-------|--------------------------------------------------------------------------------------------------------------------------------------------------------------------------------------------------------------------------------------------------------------------------------------------------------|
| requiring inpatient stay -<br>general wards                                                                                 |       | poisoning, 2010–2014." Medical<br>journal of Australia 208.8 (2018): 348-<br>353.                                                                                                                                                                                                                      |
| Percent Emergency<br>Department presentations<br>with attempt requiring<br>requiring inpatient stay -<br>mental health ward | 5.0%  | Derived from Perera, Jayashanki, et<br>al. "Presentations to NSW emergency<br>departments with self-harm, suicidal<br>suicidal thoughts, or intentional<br>poisoning, 2010–2014." Medical<br>journal of Australia 208.8 (2018): 348-<br>353.                                                           |
| Percent Emergency<br>Department presentations<br>with suicidal thoughts<br>requiring ambulance<br>transfer                  | 55.0% | Derived from Turning Point (2019)<br>Beyond the Emergency: A national<br>study of ambulance responses to<br>men's mental health. Richmond,<br>Victoria. It was assumed the rate of<br>ambulance call outs would be the<br>same for females.                                                            |
| Percent Emergency<br>Department presentations<br>with suicidal thoughts<br>requiring inpatient stay -<br>general wards      | 3.0%  | Derived from Perera, Jayashanki, et<br>al. "Presentations to NSW emergency<br>departments with self-harm, suicidal<br>suicidal thoughts, or intentional<br>poisoning, 2010–2014." Medical<br>journal of Australia 208.8 (2018): 348-<br>353.                                                           |
| Percent Emergency<br>Department presentations<br>with suicidal thoughts<br>requiring inpatient stay -<br>mental health ward | 2.0%  | Derived from Perera, Jayashanki, et<br>al. "Presentations to NSW emergency<br>departments with self-harm, suicidal<br>suicidal thoughts, or intentional<br>poisoning, 2010–2014." Medical<br>journal of Australia 208.8 (2018): 348-<br>353.                                                           |
| Percent Emergency<br>Department presentations<br>with suicidal thoughts<br>requiring police presence                        | 48.0% | Derived from Turning Point (2019)<br>Beyond the Emergency: A national<br>study of ambulance responses to<br>men's mental health. Richmond,<br>Victoria.                                                                                                                                                |
| Percent suicide deaths<br>undergoing coronial<br>investigation                                                              | 80.0% | Derived from Department of<br>Infrastructure, Transport, Regional<br>Development and Local Government<br>Bureau of Infrastructure, Transport<br>and Regional Economics (2009).<br>Assumed 80% of road fatalities<br>proceed to coronial investigation.                                                 |
| Assumed percent bereaved<br>persons requiring minimal<br>bereavement time                                                   | 38.1% | Derived from Spiller, H., Ackerman,<br>J., Smith, G., Kistamgari, S., Funk, A.,<br>McDermott, M., & Casavant, M.<br>'Suicide attempts by self-poisoning in<br>the United States among 10-25 year<br>olds from 2000 to 2018: substances<br>used, temporal changes and<br>demographics' (2020), Clinical |

|                                                                                |       |                                                                                                                                                                                                                                                                                                                                                                                                                                                              |
|--------------------------------------------------------------------------------|-------|--------------------------------------------------------------------------------------------------------------------------------------------------------------------------------------------------------------------------------------------------------------------------------------------------------------------------------------------------------------------------------------------------------------------------------------------------------------|
|                                                                                |       | Toxicology, Volume 58, Issue 7; and Safe Work Australia (2015), 'The cost of work-related injury and illness for Australian employers, workers and the community: 2012-13'                                                                                                                                                                                                                                                                                   |
| Assumed percent suicide attempts requiring minimal recovery time               | 38.1% | Derived from Spiller, H., Ackerman, J., Smith, G., Kistamgari, S., Funk, A., McDermott, M., & Casavant, M. 'Suicide attempts by self-poisoning in the United States among 10-25 year olds from 2000 to 2018: substances used, temporal changes and demographics' (2020), Clinical Toxicology, Volume 58, Issue 7; and Safe Work Australia (2015), 'The cost of work-related injury and illness for Australian employers, workers and the community: 2012-13' |
| Assumed percent bereaved persons requiring moderate bereavement time (assumed) | 24.8% | Derived from Martin, M., Weng, J., Demetriades, D., & Salim, A. 'Patterns of injury and functional outcomes after hanging: analysis of the National Trauma Data Bank' (2005), American Journal of Surgery, Volume 190, Issue 6; and Safe Work Australia (2015), 'The cost of work-related injury and illness for Australian employers, workers and the community: 2012-13'                                                                                   |
| Percent suicide attempts requiring moderate recovery time                      | 24.8% | Derived from Martin, M., Weng, J., Demetriades, D., & Salim, A. 'Patterns of injury and functional outcomes after hanging: analysis of the National Trauma Data Bank' (2005), American Journal of Surgery, Volume 190, Issue 6; and Safe Work Australia (2015), 'The cost of work-related injury and illness for Australian employers, workers and the community: 2012-13'                                                                                   |
| Assumed percent bereaved persons requiring significant bereavement time        | 3.2%  | Derived from Jeong, S., Gu, J., & Kim, W. 'Analysis of self-inflicted lacerations to the wrist: a multi-disciplinary approach to treating' (2020), The Journal of Hand Surgery, Volume 25, Issue 1; and Safe Work Australia (2015), 'The cost of work-related injury and illness for Australian employers, workers and the community: 2012-13'                                                                                                               |

|                                                                      |                        |                                  |                                                                                                                                                                                                                                                                                                                                                                                                                                  |
|----------------------------------------------------------------------|------------------------|----------------------------------|----------------------------------------------------------------------------------------------------------------------------------------------------------------------------------------------------------------------------------------------------------------------------------------------------------------------------------------------------------------------------------------------------------------------------------|
| Assumed percent suicide attempts requiring significant recovery time |                        | 3.2%                             | Derived from Jeong, S., Gu, J., & Kim, W. 'Analysis of self-inflicted lacerations to the wrist: a multi-disciplinary approach to treating' (2020), The Journal of Hand Surgery, Volume 25, Issue 1; and Safe Work Australia (2015), 'The cost of work-related injury and illness for Australian employers, workers and the community: 2012-13                                                                                    |
| Assumed average days affected per week from suicidal thoughts        |                        | 0.02                             |                                                                                                                                                                                                                                                                                                                                                                                                                                  |
| Assumed average weeks off work for bereavement                       |                        | 2.27                             |                                                                                                                                                                                                                                                                                                                                                                                                                                  |
| Assumed average weeks off work for suicidal thoughts and distress    |                        | 1                                |                                                                                                                                                                                                                                                                                                                                                                                                                                  |
| Assumed percent people with suicidal thoughts of working age         | Gender                 | [M] 93%<br>[F] 94%               |                                                                                                                                                                                                                                                                                                                                                                                                                                  |
| Assumed percent suicide attempts by people of working age            | Gender                 | [M] 93%<br>[F] 94%               |                                                                                                                                                                                                                                                                                                                                                                                                                                  |
| Average assumed Years Life Lost for people with attempt history      | Gender                 | [M] 25.7 years<br>[F] 31.7 years | Total Life years lost <average age of death minus life expectancy of person with history of suicide attempt>                                                                                                                                                                                                                                                                                                                     |
| Average cost for carers for people with full incapacitation          | Government             | \$1,050                          | Assumed lost income experienced because of providing informal care of an average 36.2 hours per week                                                                                                                                                                                                                                                                                                                             |
| Average cost per ambulance transfer                                  | Consumer out of pocket | \$380                            | Unit cost of the ambulance call out is based on NSW ambulance and updated using consumer price inflation index.<br>Source: <a href="https://www.ambulance.nsw.gov.au/our-services/accounts-and-fees">https://www.ambulance.nsw.gov.au/our-services/accounts-and-fees</a>                                                                                                                                                         |
| Average cost per coronial investigation                              | Government             | \$2,700                          | Average cost of coronial investigation per person for a road fatality, derived from Coroners Court New South Wales (2020), Understanding the NSW coronial jurisdiction, < <a href="https://www.coroners.nsw.gov.au/coronerscourt/the-coronial-process/what-to-expect-during-the-coronial-process.html">https://www.coroners.nsw.gov.au/coronerscourt/the-coronial-process/what-to-expect-during-the-coronial-process.html</a> >. |
| Average cost per Emergency Department visit - suicide attempt        | Government             | \$924                            | Derived from Hospital Independent Pricing Authority, National Hospital Cost Data Collection, Round 21, 2016-17.<br>Updated using health care inflation rate.                                                                                                                                                                                                                                                                     |

|                                                                 |                        |                                |                                                                                                                                                                                                                                                                                                                                                                 |
|-----------------------------------------------------------------|------------------------|--------------------------------|-----------------------------------------------------------------------------------------------------------------------------------------------------------------------------------------------------------------------------------------------------------------------------------------------------------------------------------------------------------------|
| Average cost per Emergency Department visit - suicidal thoughts | Government             | \$561                          | Derived from Hospital Independent Pricing Authority, National Hospital Cost Data Collection, Round 21, 2016-17.<br>Updated using health care inflation rate                                                                                                                                                                                                     |
| Average cost per funeral                                        | Consumer out of pocket | \$4,000                        | Derived from Money Smart updated using consumer price inflation index. < <a href="https://moneysmart.gov.au/paying-for-your-funeral">https://moneysmart.gov.au/paying-for-your-funeral</a> >                                                                                                                                                                    |
| Average cost per inpatient stay - general wards                 | Government             | \$2,814                        | Unit cost of \$1,876 based on mental health related from Productivity Commission Report times the average length of stay (1.5 days).                                                                                                                                                                                                                            |
| Average cost per inpatient stay - mental health wards           | Government             | \$3,762                        | Unit cost of \$1,254 is used based on mental health related from Productivity Commission Report times the average length of stay (3 days).                                                                                                                                                                                                                      |
| Average cost per person - intensive aftercare                   | Government             | \$871                          | Derived from Beyond Blue Way Back Support Service Evaluation report (2019). < <a href="#">7-1-hunter-wbss_final-report_v4-4.pdf</a> ( <a href="http://beyondblue.org.au">beyondblue.org.au</a> )>                                                                                                                                                               |
| Average cost per person - simple aftercare                      | Government             | \$330                          | Assumed that 5 hours support is needed by support coordinator per patient.                                                                                                                                                                                                                                                                                      |
| Average cost per police presence                                | Government             | \$256                          | Assumed that the cost of a police officer involvement due to a suicide attempt is assumed to be approximately 5 hrs. Costs are derived from NSW Police report : < <a href="https://www.police.nsw.gov.au/recruitment/the_career/general_duties/working_conditions">https://www.police.nsw.gov.au/recruitment/the_career/general_duties/working_conditions</a> > |
| Average Family and carer cost per completed suicide             | Government             | \$1,543                        | Derived from Visser, Victoria S., Tracy A. Comans, and Paul A. Scuffham. "Evaluation of the effectiveness of a community-based crisis intervention program for people bereaved by suicide." Journal of community psychology 42.1 (2014): 19-28.<br><br>11 GP consultation visits and 4 psychologist visits were considered                                      |
| Average number of bereaved persons per suicide death            |                        | 7 persons                      | Derived from Schneidman, E.S. (1972) Survivors of suicide. Springfield Illinois, USA.                                                                                                                                                                                                                                                                           |
| Average productive years lost per suicide death                 | Gender                 | [M] 26.1 years<br>[F] 26 years | Derived from Causes of Death, Australia, 2019   Australian Bureau of Statistics ( <a href="http://abs.gov.au">abs.gov.au</a> )                                                                                                                                                                                                                                  |



|                                                                |            |                            |                                                                                                                                                                                                                                                                                                                                                                                                                                                                                       |
|----------------------------------------------------------------|------------|----------------------------|---------------------------------------------------------------------------------------------------------------------------------------------------------------------------------------------------------------------------------------------------------------------------------------------------------------------------------------------------------------------------------------------------------------------------------------------------------------------------------------|
|                                                                |            |                            | <a href="https://www.abs.gov.au/statistics/labour/employment-and-unemployment/retirement-and-retirement-intentions-australia/latest-release">https://www.abs.gov.au/statistics/labour/employment-and-unemployment/retirement-and-retirement-intentions-australia/latest-release</a>                                                                                                                                                                                                   |
| Average reduced capacity from bereavement                      |            | 12.30%                     | Derived from United Synergies and Griffith University (2011) Economic Evaluation of the StandBy Response Service.                                                                                                                                                                                                                                                                                                                                                                     |
| Average weekly earning                                         | Gender     | [M] \$1,300<br>[F] \$1,000 | Derived from Employee earnings, August 2020   Australian Bureau of Statistics (abs.gov.au)                                                                                                                                                                                                                                                                                                                                                                                            |
| Disdisutility value - suicidal thoughts no attempt no crisis   | Gender     | [M] 0.09<br>[F] 0.08       | Population norms, average health utility, age adjusted is derived from Hawthorne, Graeme, Sam Korn, and Jeff Richardson. "Population norms for the AQoL derived from the 2007 Australian National Survey of Mental Health and Wellbeing." Australian and New Zealand journal of public health 37.1 (2013): 7-16.                                                                                                                                                                      |
| Duration in crisis suicidal thoughts                           |            | 2 weeks                    |                                                                                                                                                                                                                                                                                                                                                                                                                                                                                       |
| Police cost per completed suicide                              | Government | \$984                      | Derived from [1] NSW Police Force 2018-19 Annual Report, [2] O'Dea, D. and Tucker, S. (2005) The Cost of Suicide to Society. Wellington: Ministry of Health<br>The cost of a police officer involvement due to a suicide attempt is assumed to be approximately 17.5 hrs.<br>Derived from <a href="https://www.police.nsw.gov.au/recruitment/the_career/general_duties/working_conditions">https://www.police.nsw.gov.au/recruitment/the_career/general_duties/working_conditions</a> |
| Life expectancy modifier for people with severe incapacitation |            | 0.5                        |                                                                                                                                                                                                                                                                                                                                                                                                                                                                                       |
| NPV discount rate percent per annum                            |            | 5%                         | Derived from Pharmaceutical Benefits Advisory Committee guidance. < <a href="https://pbac.pbs.gov.au/section-3a/3a-1-overview-and-rationale-of-economic-evaluation.html">https://pbac.pbs.gov.au/section-3a/3a-1-overview-and-rationale-of-economic-evaluation.html</a> >                                                                                                                                                                                                             |
| Percent attempts resulting in severe disability                |            | 0.6%                       | Derived from Kinchin, I., Doran, C., Hall, W., & Meurk, C. (2017). 'Understanding the true economic impact of self-harming behaviour', Lancet Psychiatry, 4(12):900-901.                                                                                                                                                                                                                                                                                                              |
| Percent attempts resulting in temporary disability             |            | 50%                        | Derived from Kinchin, I., Doran, C., Hall, W., & Meurk, C. (2017).                                                                                                                                                                                                                                                                                                                                                                                                                    |

|                                                                                        |                                             |                                            |                                                                                                                                                   |
|----------------------------------------------------------------------------------------|---------------------------------------------|--------------------------------------------|---------------------------------------------------------------------------------------------------------------------------------------------------|
|                                                                                        |                                             |                                            | 'Understanding the true economic impact of self-harming behaviour', Lancet Psychiatry, 4(12):900-901.                                             |
| Percent general population in the labour force full time                               |                                             | 65%                                        | Australian Bureau of Statistics, Labour Force, Australia, December 2019 (Catalogue No. 6202.0)                                                    |
| Percent people with attempt in the labour force full time                              | Gender                                      | 46%                                        | Australian Bureau of Statistics, Labour Force, Australia, December 2019 (Catalogue No. 6202.0)                                                    |
| Unit cost of community-based care suicidal thoughts no attempt history                 | Gender, Underlying mental health, CostGroup | [M, Yes, Government]: \$509.00             | Derived from the National Survey of Mental Health and Wellbeing, 2007 Unit Cost are derived from Medicare Benefits Schedule (MBS) item numbers.   |
|                                                                                        |                                             | [M, No, Government]: \$369.16              |                                                                                                                                                   |
|                                                                                        |                                             | [M, Yes, Consumer Out-of-pocket]: \$210.86 |                                                                                                                                                   |
|                                                                                        |                                             | [M, No, Consumer Out-of-pocket]: \$189.93  |                                                                                                                                                   |
|                                                                                        |                                             | [F, Yes, Government]: \$853.25             |                                                                                                                                                   |
| Unit cost of community-based care only suicidal thoughts with attempt history          | Gender, Underlying mental health, CostGroup | [F, No, Government]: \$772.90              | Derived from the National Survey of Mental Health and Wellbeing, 2007. Unit costs are derived from Medicare Benefits Schedule (MBS) item numbers. |
|                                                                                        |                                             | [F, Yes, Consumer Out-of-pocket]: \$595.57 |                                                                                                                                                   |
|                                                                                        |                                             | [F, No, Consumer Out-of-pocket]: \$584.39  |                                                                                                                                                   |
|                                                                                        |                                             | [M, Yes, Government]: \$490.34             |                                                                                                                                                   |
|                                                                                        |                                             | [M, No, Government]: \$490.34              |                                                                                                                                                   |
| Unit cost of community-based care GP only support recent attempt                       | Gender, Underlying mental health, CostGroup | [M, Yes, Consumer Out-of-pocket]: \$459.29 | Derived from the National Survey of Mental Health and Wellbeing, 2007. Unit costs are derived from Medicare Benefits Schedule (MBS) item numbers. |
|                                                                                        |                                             | [M, No, Consumer Out-of-pocket]: \$459.29  |                                                                                                                                                   |
|                                                                                        |                                             | [F, Yes, Government]: \$928.15             |                                                                                                                                                   |
|                                                                                        |                                             | [F, No, Government]: \$510.25              |                                                                                                                                                   |
|                                                                                        |                                             | [F, Yes, Consumer Out-of-pocket]: \$145.1  |                                                                                                                                                   |
| Unit cost of community-based care GP only support suicidal thoughts no attempt history | Gender, Underlying mental health, CostGroup | [F, No, Consumer Out-of-pocket]: \$82.55   | Derived from the National Survey of Mental Health and Wellbeing, 2007. Unit costs are derived from Medicare Benefits Schedule (MBS) item numbers. |
|                                                                                        |                                             | [M, Yes, Government]: \$420                |                                                                                                                                                   |
|                                                                                        |                                             | [M, No, Government]: \$420                 |                                                                                                                                                   |
|                                                                                        |                                             | [M, Yes, Consumer Out-of-pocket]: \$162.49 |                                                                                                                                                   |
|                                                                                        |                                             | [M, No, Consumer Out-of-pocket]: \$162.49  |                                                                                                                                                   |
| Unit cost of community-based care GP only support suicidal thoughts no attempt history | Gender, Underlying mental health, CostGroup | [F, Yes, Government]: \$459.05             | Derived from the National Survey of Mental Health and Wellbeing, 2007. Unit costs are derived from Medicare Benefits Schedule (MBS) item numbers. |
|                                                                                        |                                             | [F, No, Government]: \$229.95              |                                                                                                                                                   |
|                                                                                        |                                             | [F, Yes, Consumer Out-of-pocket]: \$144.49 |                                                                                                                                                   |
|                                                                                        |                                             | [F, No, Consumer Out-of-pocket]: \$90.49   |                                                                                                                                                   |
|                                                                                        |                                             | [M, Yes, Government]: \$420.00             |                                                                                                                                                   |
| Unit cost of community-based care GP only support suicidal thoughts no attempt history | Gender, Underlying mental health, CostGroup | [M, No, Government]: \$229.95              | Derived from the National Survey of Mental Health and Wellbeing, 2007. Unit costs are derived from Medicare Benefits Schedule (MBS) item numbers. |
|                                                                                        |                                             | [M, Yes, Consumer Out-of-pocket]: \$114.49 |                                                                                                                                                   |
|                                                                                        |                                             | [M, No, Consumer Out-of-pocket]: \$90.49   |                                                                                                                                                   |
|                                                                                        |                                             |                                            |                                                                                                                                                   |
|                                                                                        |                                             |                                            |                                                                                                                                                   |

|                                                                                            |                                             |                                                                                                                                                                                                                                                                                                                              |                                                                                                                                                   |
|--------------------------------------------------------------------------------------------|---------------------------------------------|------------------------------------------------------------------------------------------------------------------------------------------------------------------------------------------------------------------------------------------------------------------------------------------------------------------------------|---------------------------------------------------------------------------------------------------------------------------------------------------|
|                                                                                            |                                             | [F, Yes, Government]: \$459.05<br>[F, No, Government]: \$229.95<br>[F, Yes, Consumer Out-of-pocket]: \$114.49<br>[F, No, Consumer Out-of-pocket]: \$90.49                                                                                                                                                                    |                                                                                                                                                   |
| Unit cost of community-based care GP only support suicidal thoughts with attempt history   | Gender, Underlying mental health, CostGroup | [M, Yes, Government]: \$420.00<br>[M, No, Government]: \$229.95<br>[M, Yes, Consumer Out-of-pocket]: \$114.49<br>[M, No, Consumer Out-of-pocket]: \$90.49<br>[F, Yes, Government]: \$459.05<br>[F, No, Government]: \$229.95<br>[F, Yes, Consumer Out-of-pocket]: \$114.49<br>[F, No, Consumer Out-of-pocket]: \$90.49       | Derived from the National Survey of Mental Health and Wellbeing, 2007. Unit costs are derived from Medicare Benefits Schedule (MBS) item numbers. |
| Unit cost of community-based care GP referred to CiC recent attempt                        | Gender, Underlying mental health, CostGroup | [M, Yes, Government]: \$1264.46<br>[M, No, Government]: \$1264.46<br>[M, Yes, Consumer Out-of-pocket]: \$684.94<br>[M, No, Consumer Out-of-pocket]: \$684.94<br>[F, Yes, Government]: \$1283.49<br>[F, No, Government]: \$1283.49<br>[F, Yes, Consumer Out-of-pocket]: \$478.78<br>[F, No, Consumer Out-of-pocket]: \$478.78 | Derived from the National Survey of Mental Health and Wellbeing, 2007. Unit costs are derived from Medicare Benefits Schedule (MBS) item numbers. |
| Unit cost of community-based care CiC only recent attempt                                  | Gender, Underlying mental health, CostGroup | [M, Yes, Government]: \$1176.24<br>[M, No, Government]: \$1176.24<br>[M, Yes, Consumer Out-of-pocket]: \$682.05<br>[M, No, Consumer Out-of-pocket]: \$682.05<br>[F, Yes, Government]: \$1191.94<br>[F, No, Government]: \$1191.94<br>[F, Yes, Consumer Out-of-pocket]: \$188.22<br>[F, No, Consumer Out-of-pocket]: \$188.22 | Derived from the National Survey of Mental Health and Wellbeing, 2007. Unit costs are derived from Medicare Benefits Schedule (MBS) item numbers. |
| Unit cost of care in the community GP referred to CiC suicidal thoughts no Attempt history | Gender, Underlying mental health, CostGroup | [M, Yes, Government]: \$727<br>[M, No, Government]: \$417.78<br>[M, Yes, Consumer Out-of-pocket]: \$136.04<br>[M, No, Consumer Out-of-pocket]: \$270.85<br>[F, Yes, Government]: \$919.27<br>[F, No, Government]: \$429.89<br>[F, Yes, Consumer Out-of-pocket]:                                                              | Derived from the National Survey of Mental Health and Wellbeing, 2007. Unit costs are derived from Medicare Benefits Schedule (MBS) item numbers. |

|                                                                                                              |                                             |       |                                                                                                                                                                                                                                                                                                                                    |                                                                                                                                                                                                                                                                                                                                                                            |
|--------------------------------------------------------------------------------------------------------------|---------------------------------------------|-------|------------------------------------------------------------------------------------------------------------------------------------------------------------------------------------------------------------------------------------------------------------------------------------------------------------------------------------|----------------------------------------------------------------------------------------------------------------------------------------------------------------------------------------------------------------------------------------------------------------------------------------------------------------------------------------------------------------------------|
|                                                                                                              |                                             |       | \$393.84<br>[F, No, Consumer Out-of-pocket]<br>\$176.83                                                                                                                                                                                                                                                                            |                                                                                                                                                                                                                                                                                                                                                                            |
| Unit cost of community-based care GP referred to Community-based care suicidal thoughts with Attempt history | Gender, Underlying mental health, CostGroup |       | [M, Yes, Government]: \$746.30<br>[M, No, Government]: \$307.60<br>[M, Yes, Consumer Out-of-pocket]:<br>\$393.84<br>[M, No, Consumer Out-of-pocket]<br>\$176.83<br>[F, Yes, Government]: \$1193.62<br>[F, No, Government]: \$196.32<br>[F, Yes, Consumer Out-of-pocket]:<br>\$557.99<br>[F, No, Consumer Out-of-pocket]<br>\$60.22 | Derived from the National Survey of Mental Health and Wellbeing, 2007. Unit costs are derived from Medicare Benefits Schedule (MBS) item numbers.                                                                                                                                                                                                                          |
| Disutility value - former suicidal thoughts                                                                  | Gender                                      | 0     |                                                                                                                                                                                                                                                                                                                                    | Derived from CEA Registry (tuftsmedicalcenter.org) <Population norms minus utility decrement from event only suicidal thoughts decrement by event rates>                                                                                                                                                                                                                   |
| Disutility value - suicidal thoughts no attempt in crisis                                                    | Gender                                      | 0.32  |                                                                                                                                                                                                                                                                                                                                    | Derived from Hawthorne, Graeme, Sam Korn, and Jeff Richardson. "Population norms for the AQoL derived from the 2007 Australian National Survey of Mental Health and Wellbeing." Australian and New Zealand journal of public health 37.1 (2013): 7-16. <Population norms minus utility decrement from event of suicidal thoughts and no attempt decrement by event rates.> |
| Disutility value - suicidal thoughts recent attempt in crisis                                                | Gender                                      | 0.62  |                                                                                                                                                                                                                                                                                                                                    | Derived from CEA Registry (tuftsmedicalcenter.org) <Population norms minus utility decrement from event of suicidal thoughts and recent attempt and crisis decrement by event rates.>                                                                                                                                                                                      |
| Disutility value - suicidal thoughts recent attempt no crisis                                                | Gender                                      | 0.14  |                                                                                                                                                                                                                                                                                                                                    | <Population norms minus utility decrement from event of suicidal thoughts and recent attempt and no crisis decrement by event rates (assumed).>                                                                                                                                                                                                                            |
| Disutility value - survived attempt                                                                          | Gender                                      | 0.573 |                                                                                                                                                                                                                                                                                                                                    | Derived from Quinlivan, Leah, et al. "Risk assessment scales to predict risk of hospital treated repeat self-harm: A cost-effectiveness modelling analysis." Journal of affective disorders 249 (2019): 208-215. <Population norms minus utility decrement from event of recent                                                                                            |

|                                                                     |                  |             |                                                                                                                                                                                                                                                                                                                                                                                                                                                                                                                                                                    |
|---------------------------------------------------------------------|------------------|-------------|--------------------------------------------------------------------------------------------------------------------------------------------------------------------------------------------------------------------------------------------------------------------------------------------------------------------------------------------------------------------------------------------------------------------------------------------------------------------------------------------------------------------------------------------------------------------|
|                                                                     |                  |             | attempt survive decrement by event rates.>                                                                                                                                                                                                                                                                                                                                                                                                                                                                                                                         |
| Disutility value - well population                                  | Gender           | 0           | Derived from Hawthorne, Graeme, Sam Korn, and Jeff Richardson. "Population norms for the AQoL derived from the 2007 Australian National Survey of Mental Health and Wellbeing." Australian and New Zealand journal of public health 37.1 (2013): 7-16. <Population norms, average health utility, age adjusted>                                                                                                                                                                                                                                                    |
| Value per QALY \$                                                   | Broader societal | \$50,000    | As per PBS guidance threshold of \$50,000 is selected based on per capital GDP expenditure                                                                                                                                                                                                                                                                                                                                                                                                                                                                         |
| Weekly disability support payment for people with severe impairment | Government       | \$434/week  | Derived from Services Australia and mental health productivity commission report (2019). < <a href="https://www.servicesaustralia.gov.au/individuals/services/centrelink/disability-support-pension/how-much-you-can-get/payment-rates">https://www.servicesaustralia.gov.au/individuals/services/centrelink/disability-support-pension/how-much-you-can-get/payment-rates</a> ; <a href="https://www.pc.gov.au/inquiries/completed/mental-health/report/mental-health.pdf">https://www.pc.gov.au/inquiries/completed/mental-health/report/mental-health.pdf</a> > |
| Weeks - minimal bereavement time                                    |                  | 12 weeks    |                                                                                                                                                                                                                                                                                                                                                                                                                                                                                                                                                                    |
| Weeks - minimal recovery time                                       |                  | 0.142 weeks |                                                                                                                                                                                                                                                                                                                                                                                                                                                                                                                                                                    |
| Weeks - moderate bereavement time                                   |                  | 39 weeks    |                                                                                                                                                                                                                                                                                                                                                                                                                                                                                                                                                                    |
| Weeks - moderate recovery time                                      |                  | 4.5 weeks   |                                                                                                                                                                                                                                                                                                                                                                                                                                                                                                                                                                    |
| Weeks - significant bereavement time                                |                  | 78 weeks    |                                                                                                                                                                                                                                                                                                                                                                                                                                                                                                                                                                    |
| Weeks - significant recovery time                                   |                  | 36.5 weeks  |                                                                                                                                                                                                                                                                                                                                                                                                                                                                                                                                                                    |
| Year dollars costed in                                              |                  | 2019        |                                                                                                                                                                                                                                                                                                                                                                                                                                                                                                                                                                    |
